# Supplementary material for: Modeling differentiation-state transitions linked to therapeutic escape in triple-negative breast cancer
Source: PubMed Central journal article supplement (PMC6428348; doi:10.1371/journal.pcbi.1006840), 2019-03-11

## S2 Appendix: P-Values for Dynamics Parameters

For a given treatment condition, we conducted a two-sided one-sample sign test for each dynamics parameter using the samples obtained from the resampling residuals bootstrap algorithm (see Methods). This test assesses whether a collection of samples has a continuous distribution with median  $m$  against the alternative that the distribution does not have median  $m$  at the 5% significance level. We used the MATLAB function **signtest** and the following parameter-specific medians: no division ( $\rho_i = m = 1$ ), no switching ( $\rho_{ij} = m = 0$ ), and no death ( $\rho_{iD} = m = 0$ ). A *small* p-value indicates that the null hypothesis of median  $m$  is rejected (i.e., a statistically significant difference is detected). The table below indicates that for most parameters the corresponding null hypothesis is rejected. Further, we have provided histograms of several collections of samples.

*Remark.* Before conducting each test, we added zero-mean Gaussian noise with standard deviation equal to  $10^{-7}$  to the samples to ensure a continuous empirical distribution. Without additional noise, for example, the null hypothesis of median  $m = 1$  was rejected ( $p < 0.001$ ) for  $\rho_1$  of the Trametinib+BEZ235 condition, which is not a valid outcome since all the samples have values near 1 (see histogram to the right). With additional noise, however, the outcome of the hypothesis test ( $p = 0.65$ ) is consistent with the samples.

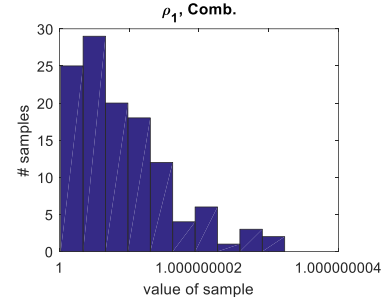

|                                                 | <b>DMSO</b> | <b>Trametinib</b> | <b>BEZ235</b> | <b>Trametinib+ BEZ235</b> |
|-------------------------------------------------|-------------|-------------------|---------------|---------------------------|
| $\rho_1 = \rho_2 = \rho_3 = \rho_4$             | $p < 0.001$ | $p < 0.001$       | $p < 0.001$   | $p = 0.65$                |
| $\rho_{12}$                                     | $p < 0.001$ | $p < 0.001$       | $p < 0.001$   | $p < 0.001$               |
| $\rho_{13}$                                     | $p < 0.001$ | $p < 0.001$       | $p < 0.001$   | $p < 0.001$               |
| $\rho_{14}$                                     | $p < 0.001$ | $p < 0.001$       | $p < 0.001$   | $p < 0.001$               |
| $\rho_{1D} = \rho_{2D} = \rho_{3D} = \rho_{4D}$ | $p < 0.001$ | $p < 0.001$       | $p < 0.001$   | $p < 0.001$               |
| $\rho_{21}$                                     | $p < 0.001$ | $p < 0.001$       | $p < 0.001$   | $p < 0.001$               |
| $\rho_{23}$                                     | $p < 0.001$ | $p < 0.001$       | $p < 0.001$   | $p = 0.52$                |
| $\rho_{24}$                                     | $p < 0.001$ | $p < 0.001$       | $p < 0.001$   | $p < 0.001$               |
| $\rho_{31}$                                     | $p < 0.001$ | $p < 0.001$       | $p = 0.0024$  | $p < 0.001$               |
| $\rho_{32}$                                     | $p < 0.001$ | $p < 0.001$       | $p < 0.001$   | $p = 0.93$                |
| $\rho_{34}$                                     | $p < 0.001$ | $p < 0.001$       | $p < 0.001$   | $p < 0.001$               |
| $\rho_{41}$                                     | $p < 0.001$ | $p < 0.001$       | $p = 0.78$    | $p < 0.001$               |
| $\rho_{42}$                                     | $p < 0.001$ | $p < 0.001$       | $p < 0.001$   | $p < 0.001$               |
| $\rho_{43}$                                     | $p < 0.001$ | $p < 0.001$       | $p < 0.001$   | $p < 0.001$               |

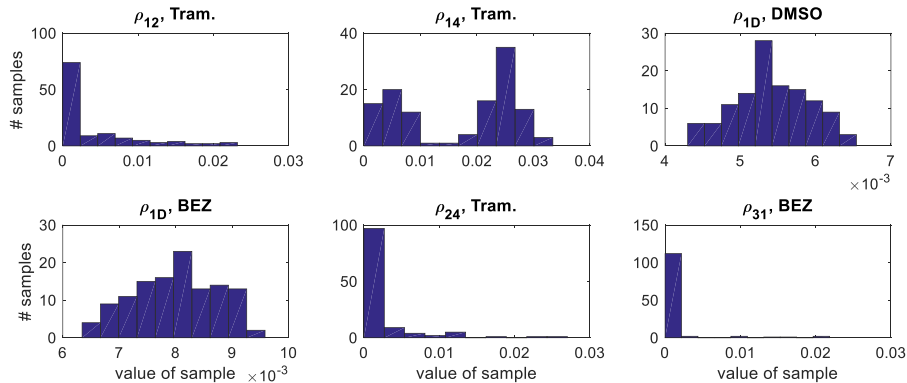

Supplement: pcbi.1006840.s008.pdf [file pcbi.1006840.s008.pdf]
