# Supplementary material for: Modeling differentiation-state transitions linked to therapeutic escape in triple-negative breast cancer
Source: PubMed Central journal article supplement (PMC6428348; doi:10.1371/journal.pcbi.1006840), 2019-03-11

## S3 Appendix: Evolution of the Dynamics Parameters during Alternating Minimization

The following figures show how the values of the dynamics parameters evolve during the iterative process of the alternating minimization algorithm, while the optimized dynamics matrix was being identified. In particular, the results indicate that the value of each dynamics parameter converges within numerical accuracy.

# DMSO

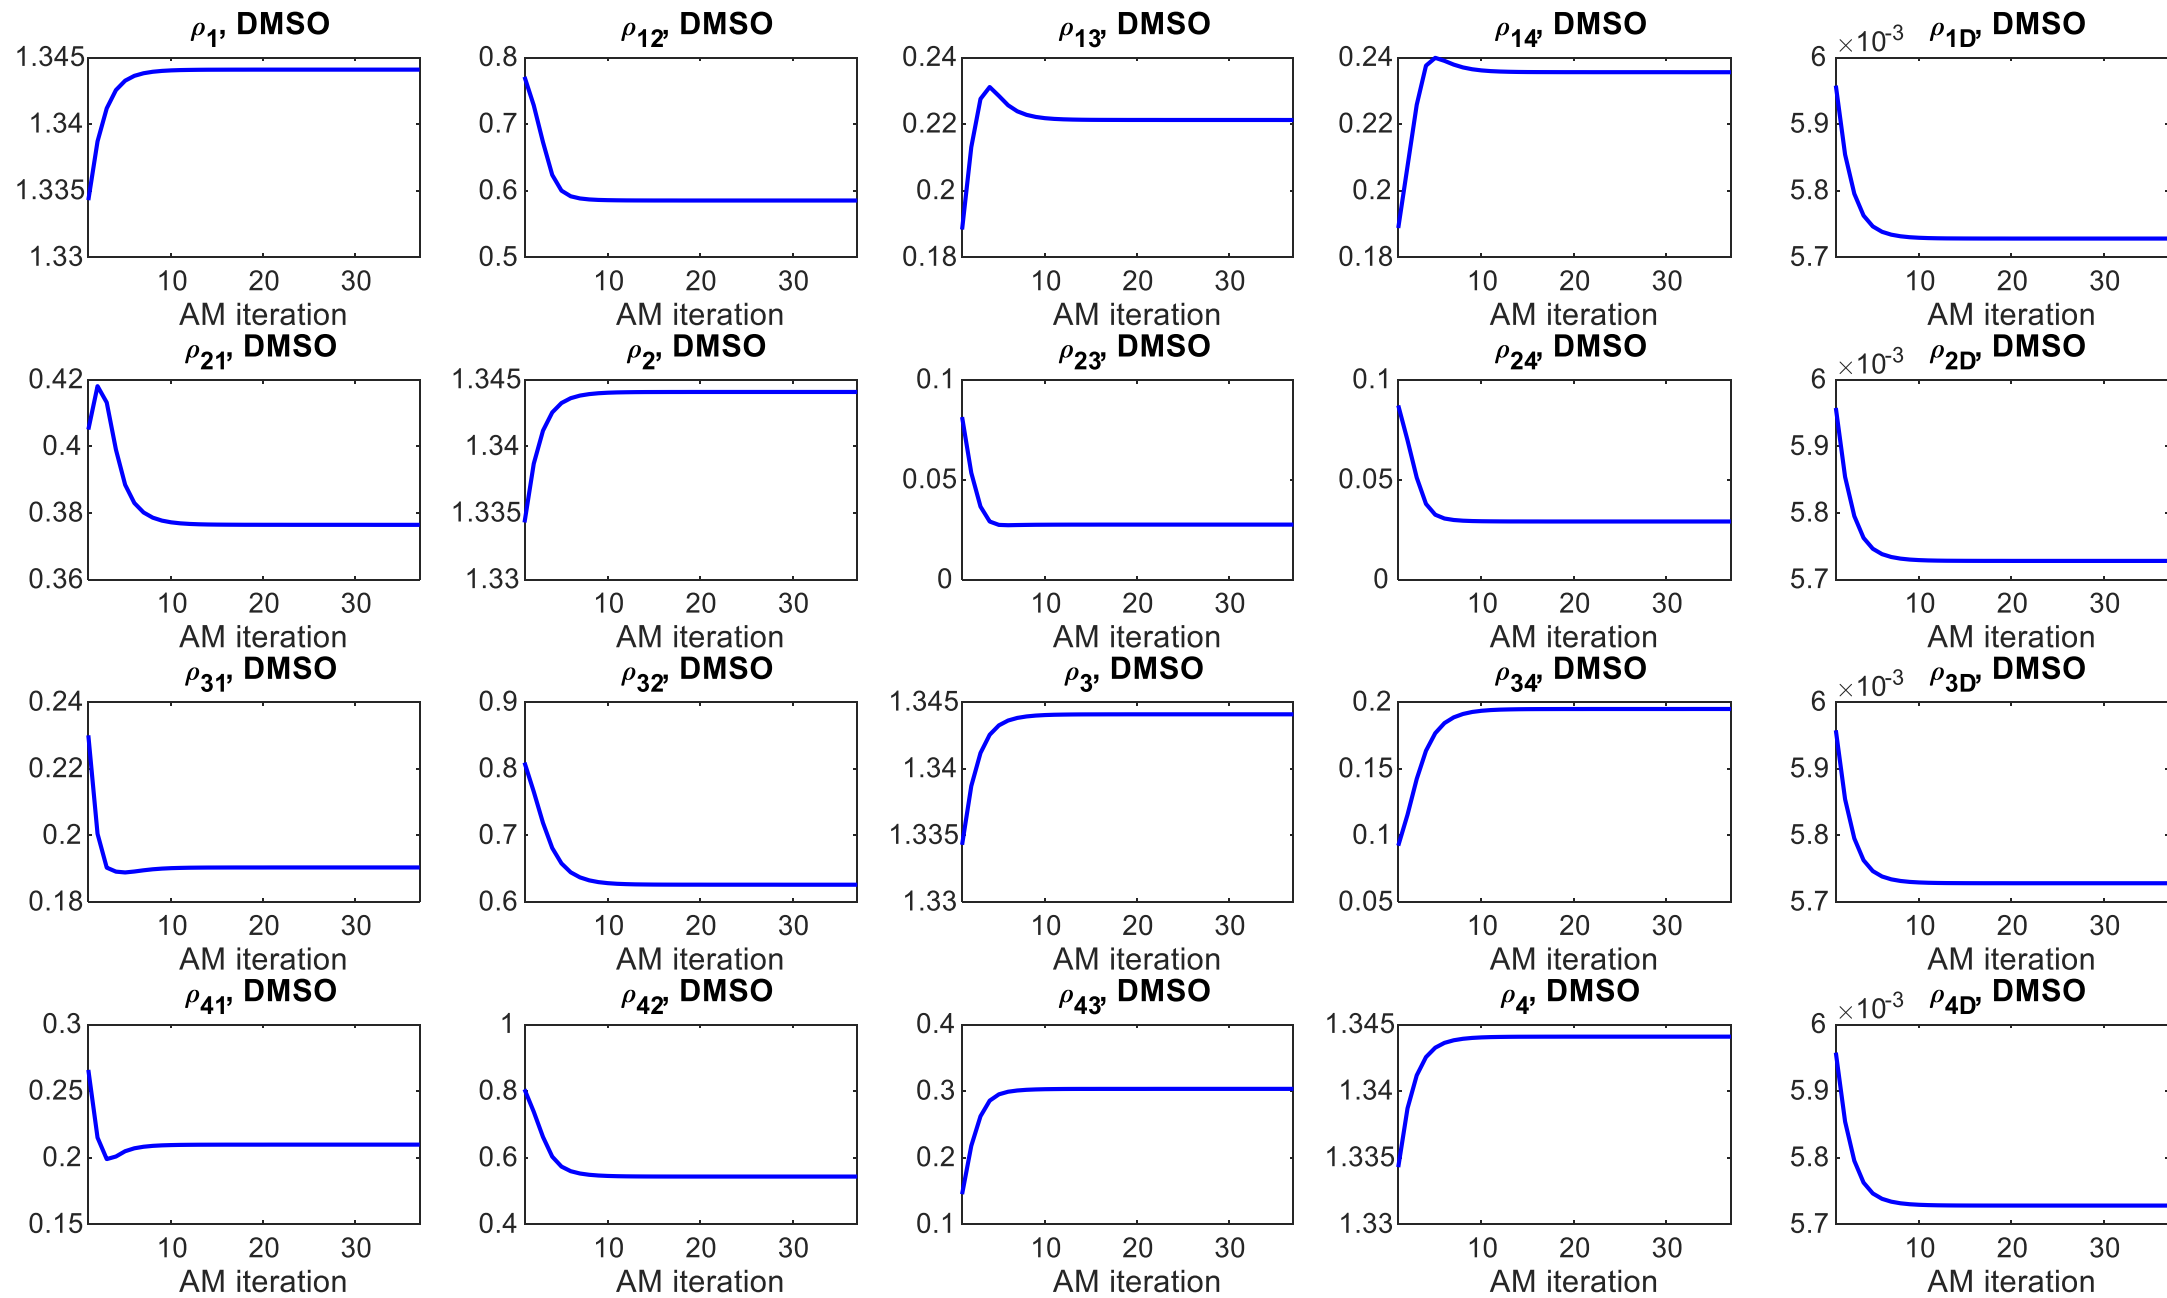

# Trametinib

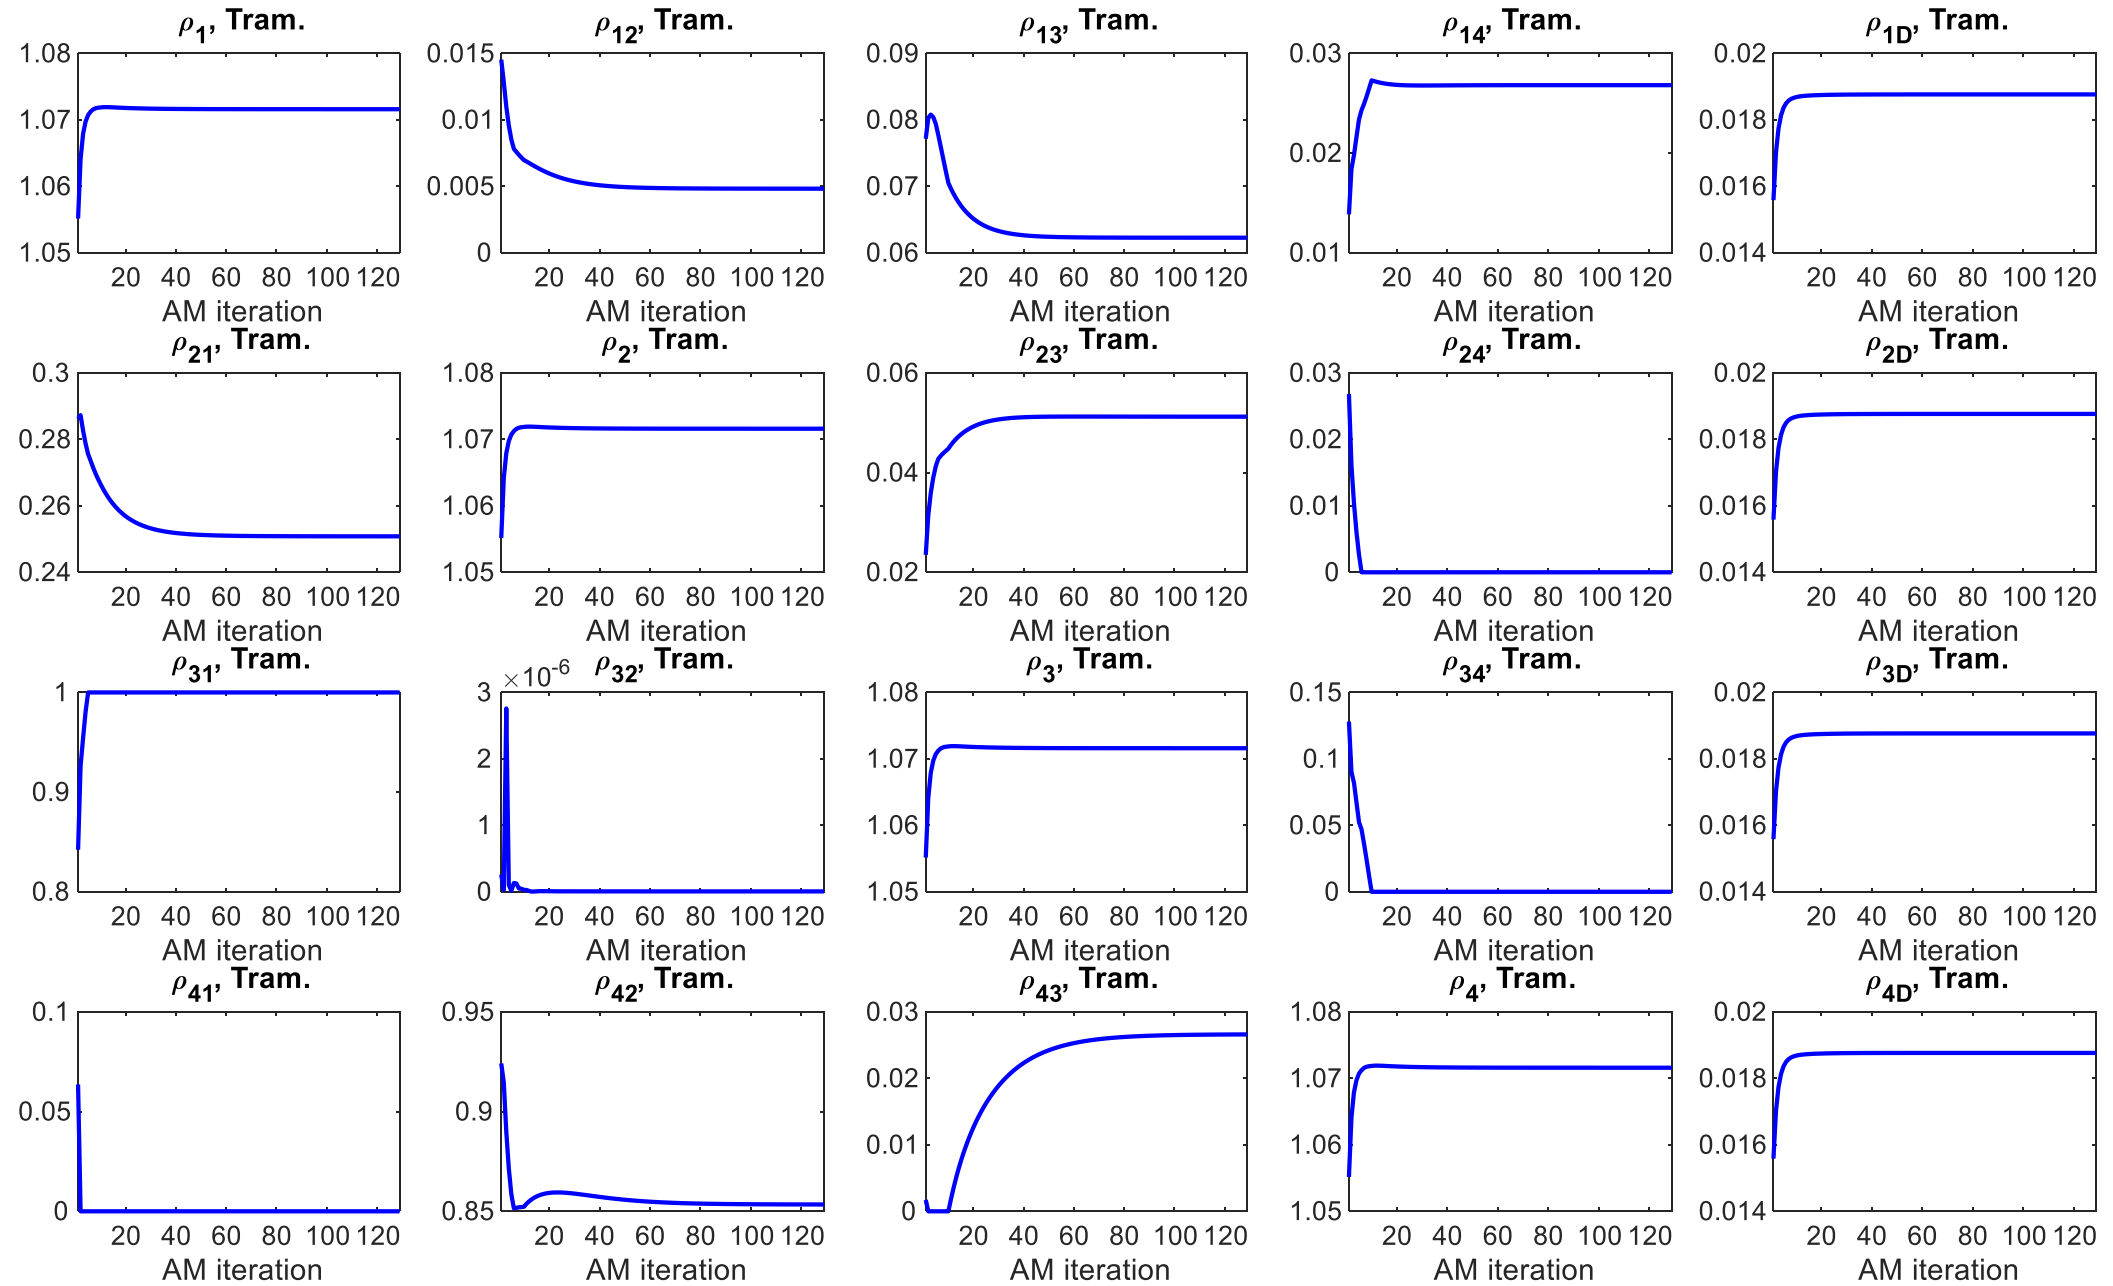

BEZ235

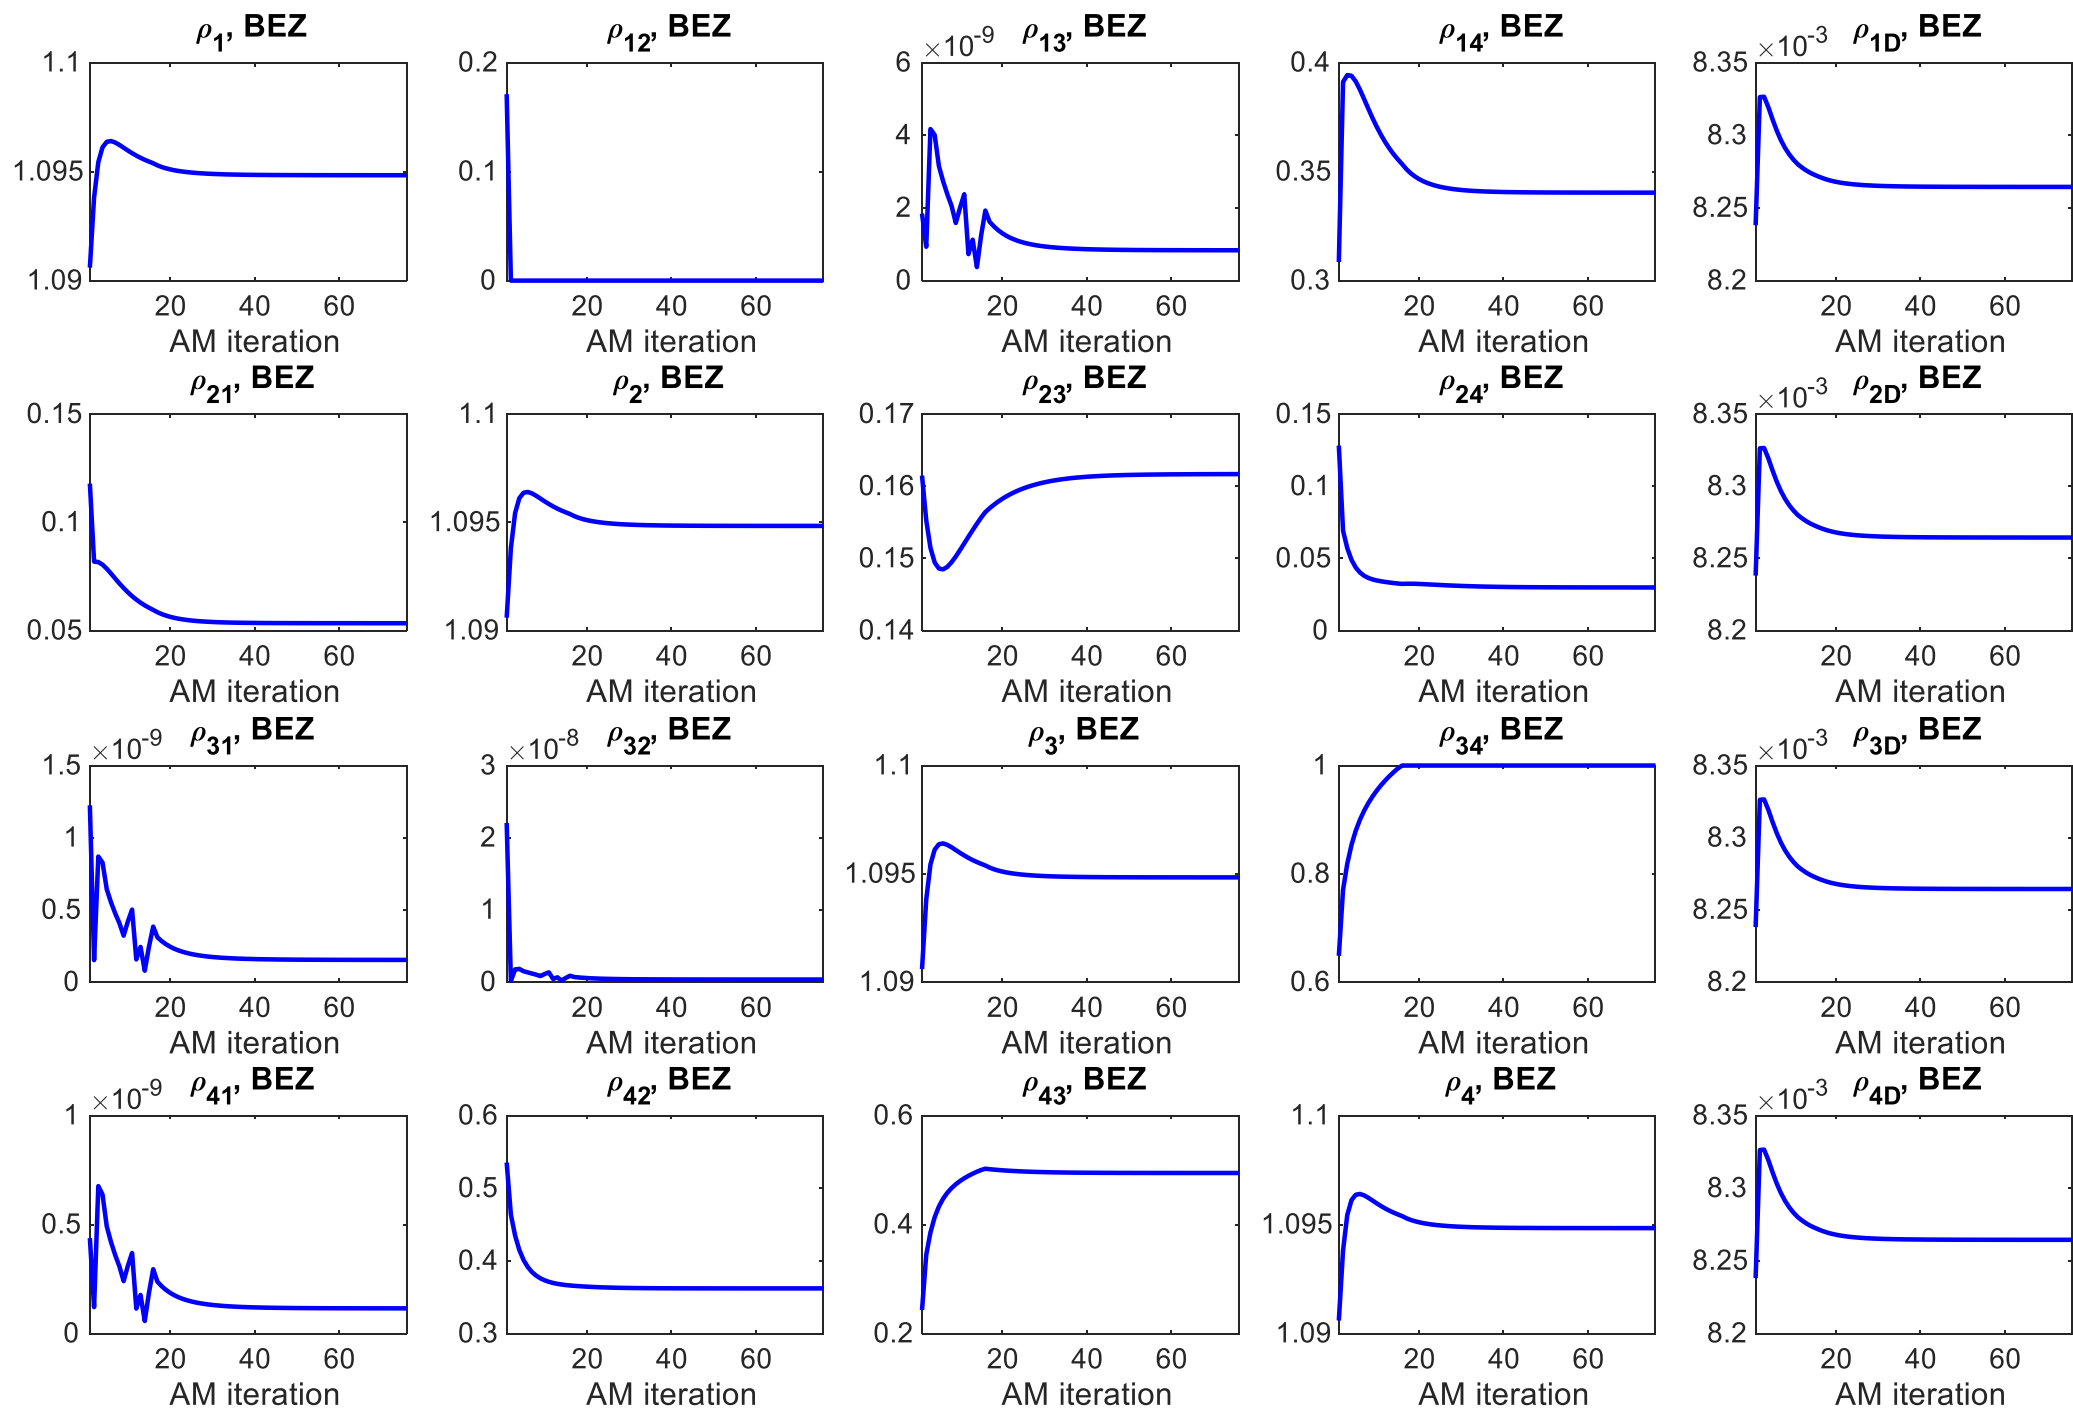

# Trametinib+BEZ235

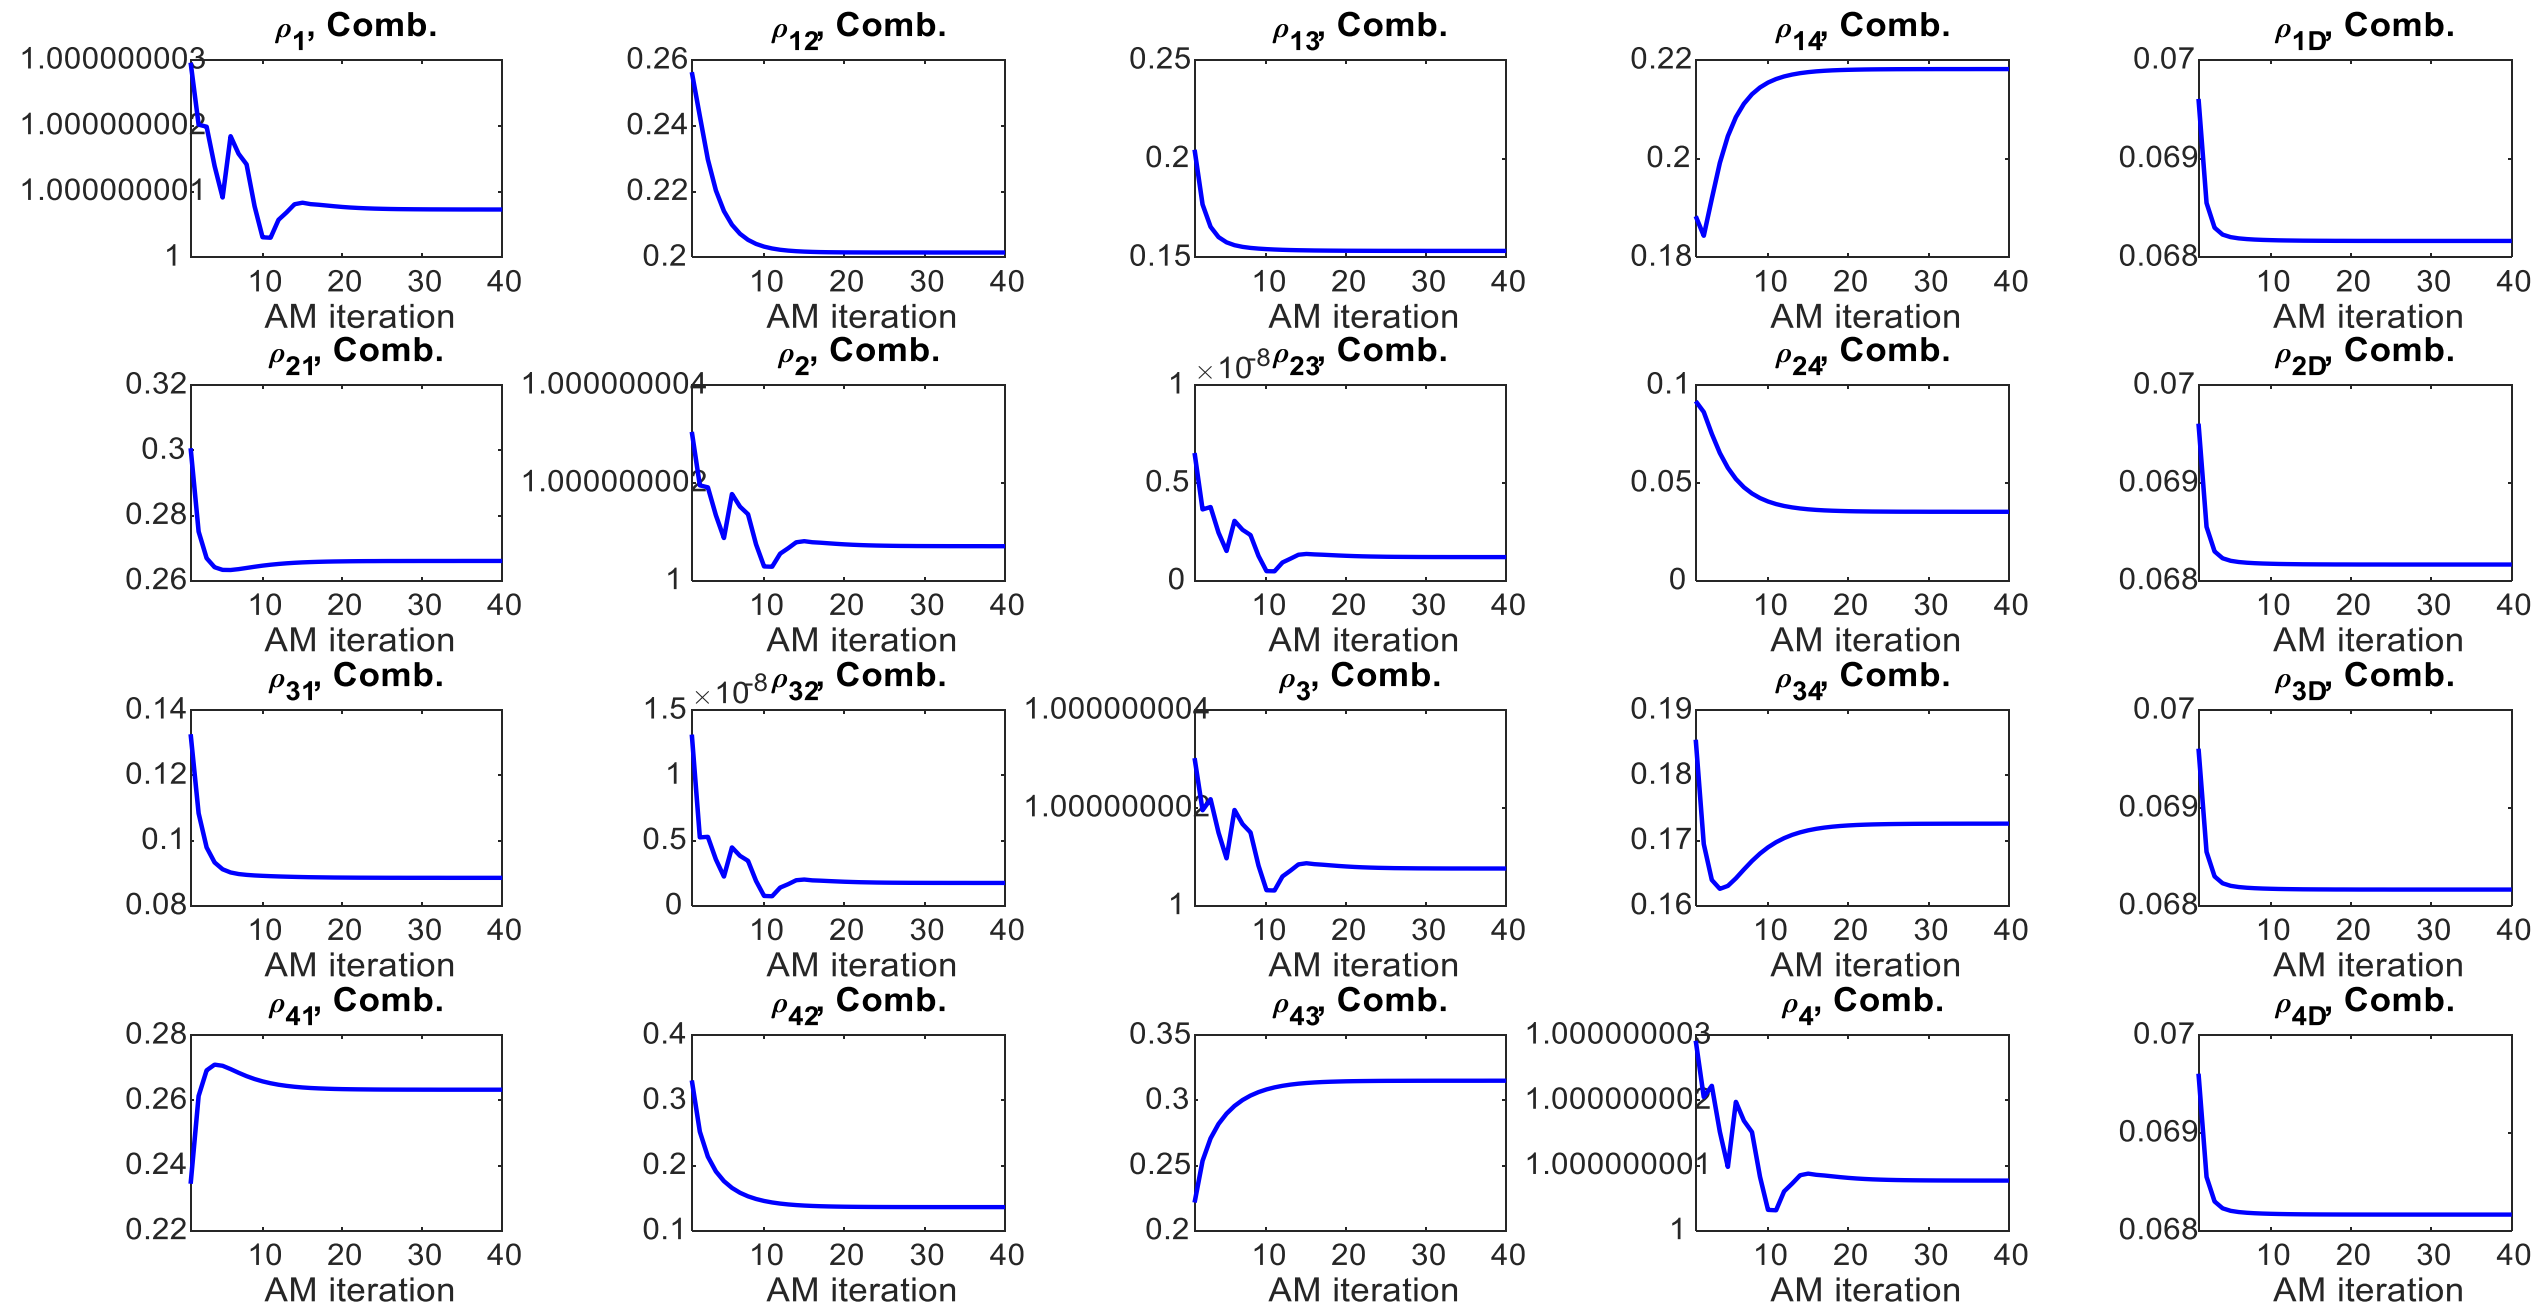

Supplement: pcbi.1006840.s009.pdf [file pcbi.1006840.s009.pdf]
