# Supplementary material for: Modeling differentiation-state transitions linked to therapeutic escape in triple-negative breast cancer
Source: PLoS Comput Biol. 2019 Mar 11;15(3):e1006840. doi: 10.1371/journal.pcbi.1006840 (PMC6428348; doi:10.1371/journal.pcbi.1006840)
Supplement: S1 Table — This table provides the values of the dynamics parameters from each drug-specific AM-optimized dynamics matrix. (XLSX) [file pcbi.1006840.s002.xlsx]

## Sheet: Sheet1
Dynamics parameters	Division parameter, cell state i	Death gain, cell state i	p12	p13	p14	p21	p23	p24	p31	p32	p34	p41	p42	p43
DMSO	1.344	0.00573	0.585	0.221	0.236	0.377	0.028	0.029	0.19	0.626	0.195	0.21	0.544	0.303
Trametinib	1.072	0.0188	0.0048	0.062	0.027	0.251	0.051	0	1	0	0	0	0.853	1.20378e-08
BEZ235	1.095	0.00826	0	0	0.34	0.053	0.162	0.03	0	0	1	0	0.362	0.495
Trametinib-BEZ235 combination	1	0.0682	0.201	0.153	0.218	0.266	0	0.0352	0.089	0	0.173	0.263	0.136	0.315
