# Supplementary material for: Modeling differentiation-state transitions linked to therapeutic escape in triple-negative breast cancer
Source: PLoS Comput Biol. 2019 Mar 11;15(3):e1006840. doi: 10.1371/journal.pcbi.1006840 (PMC6428348; doi:10.1371/journal.pcbi.1006840)
Supplement: S2 Figure Data — The data for S2 Figure is provided here. (XLSX) [file pcbi.1006840.s006.xlsx]

## Sheet: SINGLE DMSO
	DMSO			BEZ235 1uM			Trametinib 1uM
Cell#	Mean K14	Mean VIM	Mean K19	Mean K14	Mean VIM	Mean K19	Mean K14	Mean VIM	Mean K19
1	9.38413	33.6428	25.126	11.4609	38.6209	44.5353	464.227	75.9271	129.536
2	13.8149	36.7882	45.0223	11.3632	25.1666	28.2137	16.9967	72.3909	74.7066
3	400.816	31.4286	110.031	19.1509	19.0488	29.7316	100.368	17.7552	41.8053
4	397.802	29.3045	107.246	27.1098	53.0026	51.1394	31.0087	59.0366	110.947
5	12.7438	40.4275	40.5109	128.279	21.8434	27.9762	33.9588	57.5125	120.907
6	255.867	37.516	79.2286	18.0559	34.7695	82.7133	13.3773	37.5996	87.2111
7	409.979	40.0163	119.158	64.1788	32.2457	71.6813	329.656	62.7089	143.557
8	455.439	35.568	133.828	13.5174	19.8214	47.0794	257.725	41.5204	125.047
9	32.5156	41.4212	71.7617	8.19382	15.957	36.0606	147.717	11.8436	71.2531
10	121.413	108.66	99.8367	11.8861	33.2757	56.2444	65.7069	70.7197	132.987
11	17.3476	58.2196	90.8931	11.3128	28.9043	55.0128	18.34	32.3592	58.4366
12	50.3977	34.155	61.6664	11.9811	35.7504	55.7622	52.4614	51.7773	75.8507
13	45.8504	20.7013	61.8836	197.663	45.9514	145.735	28.5044	24.7873	44.7821
14	19.379	53.9778	52.3002	253.487	59.0392	186.748	31.1758	28.58	46.5504
15	9.39424	31.4798	28.5261	9.6163	19.2867	39.1563	14.8791	50.5645	54.8518
16	13.2277	46.6855	33.2913	82.6156	14.2114	46.0743	51.2314	22.5348	52.5386
17	16.6562	44.35	60.423	26.6458	43.2812	94.0597	19.8175	30.4395	102.862
18	18.0863	30.1064	39.734	58.0433	24.3644	69.9767	24.3198	39.772	151.65
19	62.5635	64.9639	69.4559	54.6603	30.8719	74.6694	48.7871	31.4769	53.6854
20	70.9346	33.3979	49.4932	9.74854	28.0535	39.872	301.225	47.356	82.4513
21	67.677	24.5755	40.3337	28.3961	51.4961	117.696	21.7042	27.2757	60.1116
22	15.2213	49.2906	46.5291	15.5177	38.6065	92.9255	129.272	5.56077	46.7611
23	29.51	104.789	77.471	17.7903	41.9176	73.9973	11.2988	41.4888	41.8533
24	12.1705	34.4131	30.5828	19.4983	23.8517	67.9139	24.4128	46.6036	77.6247
25	15.5343	32.2647	46.1382	19.2721	25.2518	66.9579	17.6483	66.5884	88.0493
26	9.15759	21.4893	24.7228	69.8341	36.505	42.1386	65.9725	31.1236	42.1637
27	750.627	15.5722	83.6463	27.3887	23.291	25.631	360.053	69.4762	127.59
28	14.2633	54.6133	75.0011	12.7807	12.2205	51.7728	63.4332	42.9782	53.6085
29	12.5884	42.3314	41.3007	122.587	21.4875	48.015	16.5325	54.0621	72.7933
30	19.5482	43.1359	40.5635	10.2032	33.528	27.2608	239.423	29.9336	93.6092
31	34.6023	22.3057	56.7186	35.2044	31.8549	40.8625	46.7327	99.2007	132.116
32	644.369	21.3618	83.9804	66.4379	17.4397	28.7055	196.704	22.7088	85.372
33	31.3613	63.1696	67.9857	36.6154	36.624	45.7084	12.0897	27.0563	42.2822
34	19.6243	23.6089	42.4133	39.4741	18.9588	31.0553	30.2102	29.6147	86.6796
35	19.9812	39.7086	57.3037	12.8321	37.5861	46.492	252.168	10.6126	72.5558
36	13.5831	55.9791	42.4739	85.3109	26.446	58.0112	86.6019	24.7867	45.7911
37	46.0618	27.0508	36.2551	24.7864	14.1506	33.6306	42.3296	281.425	173.789
38	12.5047	29.4011	52.9532	35.1651	21.1204	39.6163	451.273	42.2523	111.011
39	14.8912	31.7161	34.222	26.87	29.4747	24.9776	22.1199	39.9507	66.2422
40	15.9077	46.9541	59.9003	52.1324	30.7432	36.6912	107.825	33.1718	72.7657
41	16.7098	36.5581	42.8781	11.0551	9.28786	41.203	89.6246	24.867	47.7913
42	12.2661	47.6496	31.686	9.08619	27.6663	36.8776	116.846	19.9513	68.0161
43	11.0387	33.1679	40.3657	75.2312	33.245	55.5719	44.3349	38.1799	91.309
44	14.8331	51.2685	55.493	13.3196	15.3504	69.5219	90.2353	43.6342	76.7624
45	891.311	26.9556	154.996	8.09771	15.3719	13.1848	99.3372	89.2258	112.333
46	18.087	60.1134	59.2242	99.6799	20.8349	41.9194	63.8415	55.7516	106.517
47	18.2921	61.3991	89.917	10.8113	18.7291	31.1922	20.6328	41.2665	49.4194
48	28.3872	48.8463	68.5474	221.574	43.0473	76.4374	93.8187	58.648	97.3417
49	12.4031	35.3446	45.7178	20.9313	25.1094	28.663	158.154	59.1238	92.5537
50	23.7901	48.7452	42.8196	17.6233	11.666	55.8746	173.63	71.9406	101.557
51	526.446	51.6554	104.521	61.8271	20.0096	41.1773	22.2895	39.4267	57.667
52	29.8331	64.6068	96.4243	8.93995	15.1028	12.2265	27.8879	61.2691	88.7296
53	23.4421	45.6293	27.7442	7.73243	12.7483	28.0383	25.8998	46.8264	69.1698
54	494.755	62.2275	94.8386	18.4993	15.195	37.433	19.0444	45.0732	61.8226
55	19.6366	42.5489	22.9934	10.9829	38.5726	27.3125	24.6005	36.3038	73.5919
56	835.65	29.6833	143.141	11.5359	35.8971	40.5118	91.3237	17.9173	53.7678
57	27.9025	50.5832	56.9189	23.7152	20.7771	44.353	39.0477	29.4111	54.4571
58	22.6859	49.0241	27.8857	9.94577	26.3759	35.3692	26.5895	44.5631	91.9831
59	10.1058	40.3064	38.218	26.4177	50.3313	58.3941	27.1915	33.3529	54.418
60	19.1378	75.8849	53.1435	33.2522	18.3438	41.1216	13.6686	30.1988	69.271
61	13.1605	47.6655	37.049	15.3278	53.3291	38.153	73.9565	16.8726	52.0439
62	12.342	41.1654	56.9888	160.7	47.543	76.4727	13.322	30.229	62.7649
63	20.4081	44.7094	58.4125	9.22816	19.5472	31.1803	14.1387	30.473	91.9039
64	15.8659	48.0375	77.2843	11.8967	16.5752	37.1768	86.2011	62.6058	96.0354
65	18.0299	37.3463	62.8269	13.1353	35.0517	33.5944	13.3102	33.816	76.2644
66	154.673	50.0762	91.5336	10.7955	27.5234	26.8322	80.1849	25.9741	123.574
67	183.52	36.9241	93.4768	8.14881	9.89455	24.612	23.5468	12.5492	43.9375
68	177.563	46.0496	155.803	7.13856	16.2216	22.8624	136.026	23.2312	72.0899
69	22.8648	59.3582	44.7115	13.4133	15.4941	45.5696	82.6441	42.5261	87.7083
70	27.2534	45.8269	67.9613	13.1692	17.2341	46.7243	13.2622	42.9046	101.914
71	91.7586	60.8671	118.823	44.1648	23.188	33.9675	24.1116	45.6578	64.2486
72	145.928	47.2412	85.0536	41.5568	19.7071	38.0074	14.8256	21.5222	59.3001
73	107.922	85.086	139.646	12.2651	34.3001	44.8724	24.2137	34.9824	55.6498
74	139.876	46.2655	143.992	11.0212	31.7025	40.7222	45.3075	30.8748	69.2866
75	360.491	23.9575	99.2164	44.3234	21.7341	44.7734	12.6572	30.0761	79.0283
76	29.0493	75.1576	70.0262	11.3768	23.9905	37.757	59.6822	66.1923	74.1854
77	428.531	24.1399	104.241	39.677	78.7045	63.4151	39.1201	59.6769	89.8062
78	27.5009	41.2757	85.0142	14.7686	39.7105	41.2477	43.2618	31.6795	63.296
79	399.299	22.0655	103.201	26.4827	88.0874	63.2068	72.7407	13.6722	68.0959
80	464.77	32.8665	111.766	13.6834	16.1781	45.5082	20.0684	31.8621	72.0772
81	13.1398	34.0439	83.5358	66.3391	15.0765	33.0032	30.538	39.9051	60.713
82	516.257	35.3594	127.156	10.5983	19.2747	38.5644	49.777	24.855	65.2445
83	476.326	31.0224	124.732	9.76608	19.2009	36.6577	11.2935	39.5192	86.3739
84	35.7799	18.5204	55.202	11.5501	27.5977	43.7501	27.1664	29.8406	62.7647
85	28.184	51.7446	45.1208	9.80277	28.4258	44.0242	24.679	39.332	61.7836
86	14.2111	49.7845	49.0408	317.737	10.153	38.6622	60.6787	39.5808	85.8332
87	21.6366	28.8127	55.7438	10.9219	29.0229	36.3421	90.0399	25.3035	64.0565
88	96.1274	38.3769	67.9087	51.9337	17.0386	35.7053	14.2844	33.6568	51.5126
89	34.0168	19.4591	46.7313	10.7034	18.6748	29.6421	24.0278	52.9948	77.797
90	14.9549	42.2172	55.8601	29.2564	31.2893	33.8925	120.86	7.09252	41.8468
91	54.1647	28.9194	50.1132	9.51781	22.1853	32.497	131.832	13.147	46.7641
92	15.4469	36.9668	36.4141	371.374	9.77151	40.2679	36.6081	42.0978	71.0048
93	14.8854	51.2454	32.5775	28.5382	10.5874	39.2758	10.9848	19.5435	75.4282
94	114.53	43.0168	95.8477	10.4824	19.3573	38.1232	13.9331	31.1465	51.6486
95	11.3549	42.3703	109.77	11.483	20.3637	45.4578	68.0376	15.5385	65.8588
96	13.9588	31.7546	42.333	28.3996	13.5449	40.8717	37.5351	15.4944	37.6269
97	103.882	30.0614	99.1117	30.8228	26.6725	39.2647	11.8924	32.3349	72.4852
98	35.6193	20.634	43.9837	11.8899	28.7882	56.5714	69.1218	18.8745	43.1582
99	10.7604	33.9849	111.174	14.1512	48.3669	74.0865	13.6539	29.1987	46.5552
100	46.7234	75.128	44.8514	12.9076	30.7179	31.7605	137.692	40.014	104.161
101	15.2304	36.3561	36.0978	34.7423	16.7902	47.3494	16.8158	14.6873	48.7808
102	22.6577	18.7824	64.5836	62.9315	26.9318	40.8483	37.5413	18.7224	39.9024
103	73.2243	31.0741	50.4984	98.4089	12.9685	58.5625	307.902	27.6346	67.5824
104	97.6316	18.1184	95.394	12.2254	27.8351	64.6073	15.4769	36.4074	59.1582
105	16.7652	62.4193	40.9438	47.9792	33.6955	67.852	22.1868	22.7126	51.8596
106	14.6805	42.9228	35.8665	349.65	10.4183	39.704	46.783	61.6646	83.4533
107	18.3951	17.2948	44.7377	82.1059	12.4981	46.3866	68.0467	69.6591	87.7277
108	27.3933	65.997	118.848	11.4029	26.8224	45.4122	8.11897	8.41225	58.9542
109	24.2154	14.252	36.3795	134.255	49.4376	107.284	12.6683	15.516	55.6943
110	81.1855	29.4015	59.2125	134.802	48.842	78.5912	183.455	25.8648	97.3807
111	13.082	41.7636	81.4856	41.1393	13.494	43.0286	38.3477	26.5469	65.8927
112	15.4182	39.8889	41.2717	291.583	17.8549	51.3584	178.658	17.2522	74.8524
113	15.568	36.2387	34.7387	14.6039	35.5656	56.418	224.586	15.2482	95.2286
114	14.7279	57.2279	71.4993	151.429	34.4138	55.2771	234.395	52.534	105.329
115	24.6787	29.8989	40.2231	13.308	21.475	64.8141	13.5615	15.7964	62.2919
116	24.1257	38.7208	55.3082	12.1549	24.8357	53.8899	20.6676	44.062	90.4337
117	25.9877	55.3433	66.3699	185.983	34.2121	84.6943	138.004	26.323	58.9698
118	12.5268	48.8846	48.9154	14.1238	39.5792	66.2041	489.728	66.262	163.25
119	26.8167	66.3181	64.249	15.6314	13.221	46.3263	11.8562	11.0553	42.1584
120	12.0289	34.8182	41.6493	386.651	22.4814	68.5462	90.3555	13.3985	52.3051
121	18.2502	54.5553	32.6293	8.33854	22.3487	38.2538	47.979	34.0153	69.8957
122	15.3547	39.6067	35.6103	547.317	24.5541	65.2339	157.476	19.2319	70.3632
123	8.51338	17.6957	45.6497	499.159	18.837	65.6396	20.663	27.4014	87.5737
124	13.3407	39.1626	60.934	11.3868	40.057	34.6796	54.0232	46.0186	67.078
125	27.4634	25.7506	47.2823	15.3296	42.8139	50.8442	19.0745	53.2417	86.9505
126	30.0269	46.3993	50.072	424.303	47.3581	98.3423	205.96	52.9021	79.7221
127	13.3939	34.0943	54.9811	11.6209	36.0226	62.6515	37.1989	5.32198	36.4943
128	216.184	55.9774	126.802	32.7308	30.9681	108.418	1152.75	85.5657	323.658
129	8.57096	23.573	57.1276	14.2721	45.7657	66.1675	20.4169	21.8254	79.1912
130	10.2618	36.8823	65.0255	130.117	28.2937	43.6237	12.4949	21.3736	42.4761
131	9.4449	19.6237	48.889	22.2114	35.445	113.645	315.498	52.5514	101.257
132	9.66818	29.8482	58.9191	109.584	28.5571	52.2241	157.361	12.0095	53.4543
133	52.2872	22.5468	72.9236	13.3679	21.1616	52.6981	70.7247	87.6347	122.075
134	73.5528	24.512	96.4558	198.215	27.5364	69.4201	187.983	41.9924	93.5198
135	41.6302	60.5747	66.3653	46.4362	44.6984	137.502	11.8823	8.25677	35.1434
136	25.9465	60.0485	59.0574	8.68238	25.7636	44.572	579.667	100.099	174.023
137	23.8284	37.8106	77.7652	8.8541	24.4039	43.9787	784.957	104.192	197.205
138	11.3868	43.2557	54.9757	58.1322	22.9521	51.2364	12.4641	26.8185	78.9897
139	149.804	34.4598	80.4161	8.929	13.1892	35.8287	16.8125	32.99	59.9245
140	53.3657	32.4739	87.3776	10.1154	10.192	24.913	630.659	47.4753	149.695
141	42.236	38.139	85.3397	26.7879	35.9205	51.1676	574.156	37.6633	133.568
142	102.836	33.1989	77.3023	13.3021	30.8007	39.7219	366.21	82.5119	111.858
143	14.5228	55.306	26.9645	13.2954	37.3417	45.244	337.525	36.744	119.737
144	44.4955	20.9865	72.4273	19.8284	39.4493	65.8969	412.385	90.3956	154.449
145	11.8707	30.9822	49.6058	7.42492	14.0913	24.0901	16.3384	72.6681	57.1778
146	18.4763	27.8186	54.701	24.2693	30.5721	32.8719	94.9669	16.9166	78.4457
147	54.9146	30.693	63.3917	11.9567	25.838	36.34	13.5043	31.7181	73.7232
148	22.6903	17.3628	49.9566	38.963	18.5065	36.6638	19.7823	34.5679	59.5986
149	197.354	88.117	205.398	35.6176	23.5586	33.6674	371.072	30.9051	105.361
150	7.31888	15.0988	46.9508	16.1544	22.4519	43.3433	31.2987	77.7375	45.4123
151	10.7286	25.0468	18.5279	118.725	15.0817	23.4861	10.5455	20.7515	63.4314
152	46.6487	24.9417	74.2751	174.761	15.1047	41.7245	18.2169	25.5382	58.2881
153	21.2528	9.72059	3.72151	11.8541	19.9269	26.8336	89.4239	22.2017	64.4227
154	12.3645	11.6661	39.7912	18.8057	28.0296	52.9039	30.2089	61.2196	45.6331
155	18.0823	24.9991	55.987	11.2822	27.4103	36.9742	10.134	26.8086	65.7484
156	226.165	22.4256	100.653	12.0109	20.1276	34.1531	10.3577	13.147	48.8308
157	159.08	74.5872	174.291	12.4103	28.7583	45.1489	101.509	31.5414	91.6962
158	180.41	24.8954	77.5441	132.956	60.7671	102.837	110.945	31.5859	88.7064
159	345.913	36.4311	118.757	53.6387	18.0104	43.1389	37.6446	84.1466	65.9624
160	105.393	38.9077	64.2101	13.652	20.5259	40.8237	12.9444	6.81349	37.2328
161	88.8857	16.7022	49.0273	7.90705	13.4138	28.8581	17.0124	6.99828	53.3434
162	105.149	27.5066	59.4993	27.3962	92.7719	82.4528	12.8912	12.2331	45.0173
163	49.6691	26.6748	58.6363	7.97082	15.866	34.1129	103.059	19.2848	80.7575
164	180.831	38.2834	66.7084	11.431	33.5401	36.0774	12.9682	24.5345	44.1083
165	193.376	32.0965	89.228	51.5566	23.0335	56.5905	25.3654	86.7206	71.8358
166	61.0636	50.6181	88.56	61.2215	45.7372	75.7572	21.7604	70.2106	62.4889
167	96.1232	45.8679	119.66	9.51775	24.2147	58.9033	80.1105	16.2662	104.051
168	12.1421	38.9446	66.427	119.993	19.6535	43.4135	13.5994	11.5294	62.1849
169	6.02635	5.62322	10.4138	8.5853	10.2031	33.077	25.9484	74.3813	75.4955
170	10.5505	16.086	30.5128	285.774	74.8128	124.207	272.362	27.3143	175.871
171	15.049	57.4852	61.452	20.2038	53.6017	37.2012	439.185	25.5343	193.784
172	25.8827	35.1042	51.9552	483.831	23.5346	44.7243	9.94149	16.933	51.0235
173	58.1335	28.9242	67.7183	11.3815	42.1577	64.7042	44.975	98.0921	75.2176
174	10.8546	26.6137	51.707	310.34	48.2761	88.1592	159.701	9.40909	80.0405
175	45.1244	18.3569	48.5448	372.895	26.9183	45.8634	44.2948	101.391	75.8336
176	60.7824	25.0708	68.6263	20.829	27.8828	42.3424	241.356	49.4521	150.426
177	39.3722	46.4965	46.6316	11.044	16.5839	36.0747	25.4169	67.0375	93.0456
178	9.98404	31.3644	67.4641	14.1027	18.4911	23.1374	541.296	45.9709	223.358
179	7.67553	28.8103	52.9016	23.5918	61.4652	39.1827	17.1299	42.0539	68.1567
180	85.0072	36.1434	49.1285	10.8543	28.4448	30.0018	35.6244	70.8863	89.0366
181	80.8897	37.9607	49.1562	54.3812	19.6264	50.4499	179.521	6.86464	71.297
182	12.9692	42.8709	64.3116	13.472	31.2583	68.603	62.4129	105.057	168.376
183	125.378	22.7763	96.0228	597.577	41.0235	81.1556	421.824	9.26156	105.488
184	76.5473	52.6257	116.624	80.4345	21.885	73.8395	136.152	45.5146	101.303
185	11.2649	37.871	63.3647	51.678	73.954	121.51	603.791	9.70708	106.333
186	74.7654	31.8197	108.081	13.9234	18.6426	42.8783	596.529	21.7266	139.624
187	74.5048	49.0719	106.922	30.6236	45.9018	46.3613	295.244	6.49028	103.818
188	118.271	28.3619	77.3531	12.2177	29.3619	42.6399	311.186	6.99529	121.529
189	125.416	23.9099	74.3004	23.766	41.1272	65.0613	517.927	7.34709	105.236
190	132.803	38.91	62.9016	34.3717	48.0848	122.98	56.3555	45.7181	76.6532
191	218.41	54.8729	183.039	8.93137	18.539	38.0253	105.603	141.247	227.796
192	113.683	37.8957	92.9725	41.7616	49.9994	85.839	33.1214	21.0917	46.1624
193	85.1412	40.6546	82.1081	28.6307	11.5603	46.0633	43.372	28.6542	68.088
194	100.666	38.0281	101.041	33.1053	35.0215	66.1611	62.595	23.2833	74.0018
195	102.039	53.162	101.847	29.5044	26.7562	62.6817	62.9712	21.0016	72.2735
196	146.288	44.8428	90.8069	12.9684	37.5377	67.2377	522.237	10.2692	101.889
197	96.4198	35.4479	104.667	12.5526	34.3558	85.4682	71.1485	26.5004	68.8634
198	136.625	50.6175	79.737	9.92414	11.432	40.1964	48.3667	24.6344	51.6663
199	154.264	37.3468	77.9905	15.1459	25.991	46.7216	44.0525	35.3529	71.2083
200	179.004	14.0291	106.468	7.92453	7.92075	34.2698	67.118	26.8123	75.1921
201	145.697	10.5518	92.444	19.2196	28.4878	43.2961	580.415	10.3797	97.7385
202	132.111	17.0767	98.9905	15.3076	33.2448	84.2788	555.385	11.9062	117.561
203	46.8098	38.98	74.3996	16.8925	30.2621	48.5068	50.892	15.3009	58.1545
204	20.1084	100.784	56.08	103.888	39.7303	81.4766	61.0964	21.5276	50.4326
205	61.33	45.3519	83.0264	12.3575	41.6804	44.7637	224.116	9.36143	82.0712
206	119.068	14.0782	109.105	22.105	50.1489	49.6587	458.458	23.2795	132.821
207	19.8609	99.9929	56.9955	16.9368	27.7584	36.3042	336.172	22.8811	104.742
208	57.0834	19.1143	74.036	39.8583	44.8974	52.4985	413.183	21.3173	113.229
209	17.9478	78.9111	59.8122	26.685	28.7525	59.6777	51.0095	25.1875	73.0533
210	18.6196	41.6946	53.6553	17.141	41.2738	51.7617	68.0797	21.455	88.2642
211	20.6191	97.1202	63.8611	12.4443	38.9231	48.6815	22.5999	16.5729	54.7554
212	9.66256	14.0053	36.429	26.1493	17.5907	47.0976	34.9321	18.2547	71.7688
213	17.0635	22.3497	47.1206	19.423	24.8093	37.6238	480.486	55.4691	247.678
214	19.2642	72.3492	61.9302	18.696	32.3666	31.4705	521.642	69.8085	261.933
215	16.8441	57.722	59.3729	13.0936	39.5422	50.6587	505.061	46.2517	228.956
216	21.0918	105.66	101.657	11.2352	41.5581	78.0281	304.259	9.81834	104.032
217	26.0922	44.6478	76.0873	10.512	21.935	35.5004	203.115	13.0844	80.3915
218	19.2617	81.8012	80.3166	101.054	57.3425	90.2911	9.41113	11.9577	50.5907
219	10.5501	30.4317	38.1141	18.8793	42.1367	71.0447	423.731	12.0942	95.3402
220	12.6578	36.8628	76.5926	21.9091	44.1286	85.4023	185.641	15.9963	64.88
221	13.8284	42.7837	85.4644	21.0434	41.924	39.9207	127.588	15.3431	61.3254
222	30.5697	58.5399	81.8869	11.1877	24.1477	65.7234	211.821	14.0903	74.7318
223	10.9548	25.5491	39.4049	527.266	69.8945	114.788	178.467	15.0952	69.8318
224	12.4874	34.6961	58.5416	22.2719	43.4893	42.3194	98.5956	16.5146	63.9385
225	11.8529	29.8325	42.5922	28.6451	47.112	55.5672	15.7153	53.772	65.3487
226	37.4681	51.1364	67.9174	12.6418	33.7268	34.671	46.3601	26.165	73.6826
227	119.139	25.4847	60.2968	14.2974	42.3125	34.2568	66.979	28.0631	82.6058
228	13.143	39.2288	51.5188	12.9993	27.2098	35.2195	52.296	33.2658	87.5031
229	29.1743	23.9949	33.4006	60.8681	24.7303	49.5807	21.8317	34.4782	80.7772
230	67.6532	28.777	69.369	12.7268	18.3706	44.9855	14.6754	31.9598	50.5704
231	73.1793	26.585	50.2683	30.4867	17.8669	42.3117	555.394	8.86263	109.397
232	12.9095	33.6779	78.2335	12.8715	42.7113	49.801	14.1473	64.6033	89.5899
233	32.0333	29.9663	50.0276	37.677	43.2182	34.4702	181.199	12.0058	83.7204
234	24.7819	32.5972	72.9363	14.2775	21.0322	40.1425	13.8804	23.6185	78.3767
235	84.5947	41.3846	87.0938	11.8578	29.4938	46.4935	11.4816	24.4359	71.8797
236	72.4764	30.8759	71.4588	12.9138	30.7321	67.2783	17.8203	42.3501	58.96
237	14.4335	41.4262	97.3566	24.4433	42.8582	60.6586	231.389	16.6404	88.5841
238	20.5394	26.7176	72.1359	23.64	54.7649	34.5311	10.2362	25.6213	42.5578
239	329.077	53.6457	87.5245	14.6542	45.42	41.5996	12.0248	62.2652	68.5128
240	375.981	75.4935	110.267	12.3638	27.8482	51.9672	20.4816	28.3002	58.373
241	101.095	42.4565	80.7012	24.4241	16.2993	46.2674	13.108	40.797	47.315
242	183.698	15.551	135.694	11.9412	27.4904	63.0081	267.023	68.2555	67.8645
243	23.5013	15.8899	37.702	15.0487	31.4591	32.641	213.867	8.89221	60.452
244	10.2859	17.2037	61.2173	12.3493	31.4437	49.9273	9.04242	43.5302	71.072
245	10.3828	4.69922	9.7041	26.6993	45.4637	47.2513	68.0459	5.18048	32.904
246	11.0625	5.55	15.3986	111.695	30.8816	52.6278	12.4318	52.4205	54.8552
247	51.4468	19.2251	82.69	12.7644	42.5079	41.9056	44.2827	35.1955	88
248	36.865	19.5116	53.4991	14.435	37.6188	42.1739	13.8449	82.2439	29.1682
249	101.438	46.3904	79.6344	10.2682	18.5646	39.685	30.5382	64.8338	58.4646
250	33.0068	22.497	47.4692	15.9687	37.3951	71.9223	17.4917	41.7066	56.596
251	14.0699	42.8639	25.8739	10.6796	7.07306	37.1	9.39796	42.8388	32.3213
252	11.3279	41.9909	53.9831	40.2869	74.0295	108.174	99.659	11.3693	91.1613
253	14.8379	37.2912	34.2875	42.5745	87.2766	114.5	21.0273	53.3831	78.7011
254	15.9244	42.1768	35.9339	14.4727	30.6757	44.6633	29.1168	21.8164	56.5105
255	25.4061	59.4269	75.1631	11.0522	33.0487	36.1654	22.3055	21.6894	51.3383
256	38.0638	59.9609	67.9069	14.3346	46.3733	44.8077	22.975	21.1915	61.5031
257	15.5854	49.2381	52.5226	11.3679	29.6425	37.5193	289.347	28.3566	74.7641
258	16.299	44.9446	27.3585	10.6186	27.0342	49.6881	464.899	9.12038	125.133
259	8.11935	14.5362	41.1356	32.1166	27.09	59.0704	112.376	19.7901	87.2777
260	43.8375	42.9705	58.6436	17.3833	41.229	42.4719	187.497	36.502	82.6667
261	17.657	61.3852	33.8583	11.5485	33.9492	50.2803	32.6983	19.9423	72.3201
262	10.483	25.1348	61.2346	13.8196	29.8657	48.016	128.058	29.0417	100.423
263	12.0309	38.2013	37.51	12.0476	28.3813	34.62	22.7057	89.3922	105.199
264	13.4153	46.7663	32.1646	12.5127	28.1292	48.5148	29.5138	42.6719	105.531
265	8.17865	21.593	46.9316	12.1446	35.9547	38.4623	12.8457	13.6857	29.5673
266	31.978	42.5257	65.4709	15.8098	31.5147	39.48	20.9161	23.3545	53.0639
267	8.66288	18.0322	38.8322	91.5924	55.3179	89.5173	368.147	10.5089	113.931
268	19.9222	39.8383	61.4774	25.7647	28.1791	48.7096	82.6754	60.2018	114.93
269	31.1346	47.3836	46.8171	11.984	31.2788	62.5564	28.4582	53.2059	89.3718
270	12.0294	37.1451	86.3315	15.716	29.4644	53.1628	262.544	9.8166	77.8412
271	14.1916	36.6292	29.6107	20.6589	46.7343	46.2957	85.5327	37.8864	88.3564
272	16.3178	38.129	32.3533	111.32	27.9043	84.2048	33.9579	43.0925	78.9682
273	14.907	38.6981	26.6844	174.306	24.522	64.5278	14.2945	25.3611	43.0631
274	22.9844	43.0492	54.7054	25.5571	16.9338	40.0419	24.4992	46.2542	82.4184
275	26.747	46.0125	66.4956	77.0595	25.8158	59.1902	355.025	7.66359	100.27
276	19.4015	30.032	50.1659	69.789	13.1516	35.6007	22.0875	27.2533	60.8022
277	11.0075	40.4016	64.2437	208.777	57.5623	128.343	41.0491	54.4174	91.8844
278	19.4644	77.6788	87.8092	163.119	60.8886	128.72	11.4247	44.2077	48.9694
279	10.998	37.4743	59.5623	110.878	28.8853	62.2214	85.3048	30.8958	87.2083
280	15.289	59.1954	59.5568	11.6542	27.7334	36.8788	54.8705	67.5587	91.9857
281	24.7516	55.0705	54.1587	35.0402	37.5923	73.0421	102.003	40.0593	98.7579
282	42.7802	54.9318	45.1417	13.281	31.2392	69.9553	11.8169	43.7094	40.8251
283	27.7391	62.5652	54.5957	268.314	42.2624	70.249	29.7569	44.9311	73.6138
284	15.6453	38.2765	45.0632	219.441	54.6103	99.6127	334.301	26.0942	82.8661
285	35.1941	55.1099	55.9145	171.897	45.475	89.408	273.453	34.4549	81.7337
286	82.578	47.4177	62.3591	419.205	54.5295	109.301	102.148	26.9694	115.892
287	10.1956	27.6411	43.4613	485.216	74.6915	133.534	14.1977	48.6785	73.657
288	13	34.4711	82.1363	21.6177	46.0313	54.236	45.8127	18.4827	84.7505
289	43.9565	57.9058	68.9906	15.475	40.9088	49.353	59.1862	39.0306	76.19
290	28.0655	55.3517	54.6991	20.5487	77.6603	61.9923	62.7148	41.2884	79.6478
291	15.0566	37.7615	78.6768	43.2574	31.5819	72.03	17.8657	37.7267	52.181
292	16.3854	48.5962	75.8583	77.4237	54.2921	107.167	70.6918	13.0632	78.7287
293	49.0562	30.2587	75.7519	102.207	63.4635	115.558	288.112	47.7766	88.9907
294	12.2883	38.5073	70.2791	90.545	53.0591	95.7414	98.5657	12.8157	72.8122
295	23.5095	45.6349	112.696	298.506	22.9004	60.0648	11.0404	28.3865	48.4498
296	15.5736	20.2525	71.5974	240.547	30.4283	65.8175	73.9735	21.2639	92.3846
297	23.4966	59.7441	82.5881	61.6748	14.6232	64.081	31.3425	46.9149	89.5406
298	22.8165	90.0954	81.1979	22.1228	52.4436	25.0952	21.1866	16.3285	65.6079
299	14.5716	16.0523	68.6852	48.5314	16.4509	35.4913	65.3733	27.3177	111.943
300	61.9107	59.6067	75.4439	25.9603	108.243	86.8944	25.2145	42.0976	89.2126
301	33.1433	77.4671	61.0441	185.522	18.4181	50.8829	29.8883	33.8338	83.2737
302	24.3068	46.8464	67.6621	231.26	33.0439	98.5182	104.593	15.6005	83.7775
303	30.8853	48.8757	47.632	45.081	27.6423	54.2845	11.9215	23.8047	67.1775
304	64.3674	43.3973	45.5077	7.39056	15.6855	27.3045	98.8156	19.4939	91.9737
305	21.0422	58.8549	69.6777	185.173	10.6264	49.604	287.643	46.1656	82.8194
306	34.4996	63.5776	78.6609	196.195	11.3333	45.4867	34.3734	59.0174	98.1396
307	17.0103	44.1174	45.1668	486.457	31.2111	98.0511	86.6707	30.3392	69.8168
308	285.827	26.9887	101.899	67.871	18.0009	40.8575	72.2907	43.608	111.421
309	129.528	56.3383	105.902	56.9102	44.4785	66.5943	55.4597	48.2454	74.6255
310	95.3297	64.4209	83.404	41.7987	49.3315	66.2817	42.8751	54.2641	102.398
311	46.9377	34.0736	55.3162	13.4282	31.8166	34.8497	120.766	39.81	90.7944
312	24.1625	75.3421	57.3515	25.0887	43.5322	54.5896	36.0303	75.3134	75.2342
313	33.4183	61.8082	61.8965	26.3351	38.7504	42.68	30.8869	38.7589	96.5371
314	94.4286	101.177	155.187	109.161	15.4703	105.126	121.832	8.72174	89.7597
315	431.595	25.0522	154.43	31.9787	32.7643	44.9115	44.1761	46.647	58.554
316	345.704	26.3202	132.04	13.2517	18.6177	54.7417	15.9965	53.5007	133.537
317	13.8954	27.5035	54.4499	14.8267	35.7611	36.8746	142.68	55.1418	84.1508
318	180.812	51.3709	94.6803	10.8679	29.7204	53.3585	35.6056	43.024	70.613
319	49.6627	49.3009	56.3113	340.858	28.8177	67.7993	37.3033	56.3033	114.086
320	26.622	26.5945	38.6529	16.1662	15.6185	30.3475	39.9219	53.5452	85.2566
321	352.292	17.423	79.1399	44.2346	14.2864	60.1824	37.2258	63.4504	116.887
322	24.7359	33.505	58.0614	21.2125	72.093	135.202	120.602	8.31634	97.7468
323	53.8833	62.4406	94.3445	12.3126	26.077	46.4409	13.938	49.0992	80.551
324	96.2241	108.142	115.752	144.94	14.5561	54.6913	28.5802	53.2574	100.052
325	7.97622	17.3248	23.6977	272.413	19.4792	65.2556	26.7302	38.4986	94.7167
326	20.4875	36.1679	49.1333	262.131	25.8359	64.7559	104.249	38.1288	61.0522
327	14.8712	49.3265	38.6006	211.179	23.0158	63.9646	24.545	48.1759	92.7994
328	9.87275	12.6448	17.7063	385.11	23.9489	81.4761	12.9781	21.5563	75.5559
329	370.712	27.462	98.5163	488.325	32.3827	94.5775	40.9204	60.3338	71.5442
330	53.9293	18.3064	37.8238	60.2872	25.8496	50.3496	14.2357	32.107	111.204
331	9.52806	25.7751	39.0075	355.629	24.6161	85.3358	12.8037	42.5905	96.7138
332	15.7312	11.847	33.8877	49.2946	26.4298	47.1939	24.0391	41.6509	86.0798
333	30.3911	25.9809	20.9102	338.179	20.917	69.0267	43.2871	79.3891	79.6402
334	40.9546	32.7528	24.4468	383.399	21.518	76.7939	47.6265	41.7959	121.518
335	10.5296	17.4602	38.8456	18.336	29.6978	60.7474	60.6218	31.5124	53.3907
336	11.1897	25.824	47.9117	56.4086	40.8374	49.1272	14.0754	17.9277	39.8092
337	46.023	32.5254	57.2064	357.666	30.1395	84.7591	17.1853	38.1274	56.1829
338	56.6293	39.8645	79.6787	12.7568	38.8052	58.8308	49.5986	34.3854	55.1537
339	22.5526	11.8462	40.328	302.353	14.5449	46.4435	42.2048	27.2468	104.268
340	73.7864	20.3491	36.1128	58.5657	25.5167	63.2896	20.9238	32.3375	81.4653
341	60.5685	28.5309	52.5908	14.8836	42.7762	44.9078	12.6399	25.4182	81.492
342	50.4167	34.5326	53.599	357.45	27.9143	77.2524	58.7251	49.8865	73.1806
343	36.4505	17.4886	44.8792	78.2643	13.6902	47.6231	20.6682	36.2987	51.635
344	32.9296	70.7672	79.5576	380.512	27.545	84.115	40.7035	49.4613	106.892
345	24.5429	17.5927	71.3499	385.212	29.0935	86.5313	30.0747	49.7451	101.288
346	38.6072	49.8252	61.0445	55.6607	24.6255	54.0696	64.0031	35.2091	54.3107
347	37.852	75.6783	70.8992	11.285	18.7023	72.6569	202.142	11.7489	111.58
348	11.0998	34.8585	36.2192	96.7849	8.84016	46.54	222.198	30.3436	98.4873
349	19.2219	57.7966	122.903	15.6891	39.7742	48.3184	27.739	72.385	72.7369
350	12.4275	12.696	39.8569	157.986	11.8164	53.2345	48.7398	15.6486	52.6022
351	8.07997	14.1555	37.4006	54.9272	18.8097	51.3396	302.799	21.8694	111.986
352	12.8865	30.8868	52.7665	36.1825	29.3151	57.898	201.889	7.99069	87.127
353	119.554	30.5509	36.056	61.2454	51.6413	57.7386	25.2083	65.2722	69.159
354	11.6493	24.4466	52.7513	145.331	11.7607	54.7874	20.6321	12.9301	48.9785
355	12.509	29.7744	55.9565	38.006	26.906	56.0948	35.2369	38.3574	79.8777
356	26.8596	25.8224	46.0248	34.1433	59.4525	90.515	292.387	25.3943	157.984
357	23.0971	17.6947	38.3906	32.3646	16.5548	42.3518	318.957	31.0018	166.13
358	9.74701	20.4099	33.901	30.6626	49.3315	75.126	152.787	19.1768	102.963
359	29.7869	39.228	59.3455	41.3953	50.0277	80.4818	182.072	25.7371	113.066
360	31.1722	11.769	35.5857	139.89	70.6358	72.4717	41.404	43.8684	93.5141
361	10.6955	8.44289	31.4788	83.5233	36.125	68.6912	27.9772	48.5501	79.4906
362	13.918	22.8484	64.576	56.8306	56.784	77.1555	28.9	36.5145	75.2545
363	34.6117	8.79937	29.7465	12.4319	34.4044	39.2691	23.8176	37.8355	74.0865
364	391.468	32.9174	61.0407	115.451	46.0677	52.9125	158.775	10.9704	79.3932
365	15.4838	24.0604	22.8362	331.241	43.6165	119.848	9.24844	24.3498	29.4202
366	11.8506	20.9408	25.9122	219.176	70.6972	94.3844	189.946	15.8455	93.0366
367	10.9392	21.5083	37.3519	117.486	37.654	53.4005	185.892	17.399	92.8712
368	22.3771	13.2319	37.6056	263.146	40.2608	83.2849	234.507	18.715	45.8654
369	32.7356	12.3832	36.0531	305.94	61.1128	81.5639	133.088	8.12519	71.8424
370	12.1402	8.07662	37.2603	12.6002	32.5115	41.187	167.144	10.313	78.7375
371	44.3392	8.04431	43.6682	227.836	27.3008	83.0944	8.47195	21.2539	33.7635
372	22.6582	13.3164	31.136	11.884	29.3088	38.0635	189.263	31.8095	61.9098
373	12.2835	22.064	29.2754	35.7799	81.6726	111.081	90.4141	14.2245	50.4103
374	21.3997	24.455	59.9377	181.271	27.749	60.0074	55.0323	14.3838	47.7866
375	16.0377	19.0981	51.953	24.3413	45.2406	54.7134	120.901	24.4359	63.4167
376	32.2571	9.61533	27.5997	30.1538	72.1145	72.8006	59.6099	33.1468	43.9298
377	12.3164	27.0839	27.3018	141.462	35.1442	77.1123	210.877	14.8143	83.4374
378	44.5754	7.6981	45.8333	139.307	31.9123	75.3166	161.797	15.028	79.253
379	30.8187	5.28859	25.4148	26.233	50.4498	65.193	209.847	7.77481	85.6674
380	13.6328	15.5538	41.1831	187.628	49.699	79.9328	85.8981	20.5278	65.7193
381	31.1788	51.8141	84.9443	14.5529	49.7627	39.9549	189.561	7.68482	51.3603
382	10.8225	18.8981	41.5638	15.3028	46.0486	46.1796	56.9952	34.7632	63.9762
383	12.0709	16.4321	53.6086	276.405	33.1817	77.5143	104.996	30.1002	67.4958
384	33.3167	10.3923	36.905	211.077	39.168	81.1908	378.283	70.8484	196.262
385	8.89966	13.7292	19.8673	254.015	40.4264	72.0942	317.377	39.7243	152.191
386	30.9242	12.3019	42.1354	24.286	30.554	47.9022	48.7176	15.8182	40.817
387	10.0891	19.8581	46.0549	231.146	18.8712	69.2144	78.5824	15.0921	41.7834
388	71.4863	17.5696	60.1021	145.403	61.3185	74.2562	117.391	10.6519	26.5103
389	121.53	12.596	27.9036	12.4314	32.1625	40.3262	137.298	21.088	70.6521
390	19.0755	17.0311	54.0035	10.9057	31.4025	42.3419	167.641	30.3714	67.615
391	21.8553	31.5125	61.1044	11.9654	28.8817	38.1367	8.98814	18.8661	36.4545
392	9.57526	17.6651	31.689	12.2105	25.9783	43.9803	9.956	19.3707	37.2609
393	38.9517	25.6429	31.3447	12.1427	26.2186	47.2178	7.94165	20.5189	36.1866
394	44.4852	16.3036	36.4242	12.226	29.3542	51.1811	39.1135	32.7522	34.9205
395	31.4171	8.37436	34.6701	10.4413	21.0775	40.2571	33.6353	45.2969	71.1836
396	60.9822	10.9803	31.233	13.4223	26.7269	30.8669	234.825	31.5771	49.1324
397	10.1183	19.2814	26.1465	12.2534	38.1803	39.8202	93.8636	98.6614	115.791
398	12.8906	17.1216	40.5996	10.7233	24.5007	33.7194	130.952	24.1239	52.3258
399	28.034	10.3776	55.5509	13.5379	24.1681	29.6065	18.2708	22.5136	37.443
400	16.6565	13.0636	31.8685	17.472	18.1576	41.3691	74.3523	21.9035	41.6491
401	36.3479	9.70089	43.0299	46.0848	74.9579	78.5266	33.2584	17.3469	28.9793
402	26.0994	12.0255	46.1636	15.254	45.5879	45.7277	15.0106	43.3053	60.703
403	9.90723	29.9646	52.6521	13.288	34.7773	39.3442	40.4067	15.2074	29.585
404	11.0461	16.5943	71.3694	45.3773	52.6707	63.1364	44.267	28.4512	53.1039
405	27.9991	15.5976	29.9069	36.5258	33.0763	55.2938	129.577	13.3868	42.8766
406	7.71019	22.4148	53.0361	38.6066	22.9495	44.8902	181.428	28.9422	71.3398
407	30.2659	10.3043	38.7278	20.7641	33.3874	49.3475	85.2219	27.8269	33.3733
408	28.6417	15.7287	61.7945	16.756	41.9308	40.1322	15.4257	27.4786	48.3658
409	16.4898	19.1244	48.3474	46.9936	10.8232	39.302	198.52	20.4594	48.3138
410	8.97873	23.4559	32.6583	46.3999	9.84852	42.2169	170.576	19.3582	74.9627
411	7.29175	18.4903	41.2122	22.7116	35.7143	54.1299	52.3177	31.1057	30.5342
412	17.3945	38.7323	60.5681	154.813	12.6258	74.7319	53.5899	22.6296	75.231
413	23.8524	14.7245	54.2942	232.914	13.6841	80.8263	48.1728	25.5869	53.2622
414	7.24052	15.1239	42.5311	28.7214	32.9435	49.7891	130.926	18.7252	47.7072
415	20.8961	18.5314	46.5547	43.5944	74.4869	59.0929	95.7244	13.9967	38.0683
416	7.259	24.4081	48.9588	15.6112	27.3989	86.176	17.1897	33.1462	45.9584
417	11.1802	17.3707	31.2819	17.0996	20.1739	61.6744	24.5968	42.8553	84.4362
418	27.173	14.0707	28.6766	1043.2	88.2572	227.855	13.388	9.63709	25.9884
419	9.75764	15.1549	28.8399	36.7506	47.1872	54.1748	138.873	27.2682	61.697
420	26.2809	38.5374	43.7318	18.1484	37.2139	30.0027	15.9098	28.8497	66.7556
421	17.455	25.9387	50.9664	45.0562	21.6704	48.8679	165.11	16.6336	74.5833
422	71.2787	44.5879	78.2787	103.621	77.3432	126.072	85.6247	18.4246	43.7187
423	7.84566	23.5309	43.9071	20.9331	9.84333	36.4333	84.8901	24.0581	36.8974
424	21.6343	19.7334	47.4078	20.6523	39.7263	44.4807	16.1239	27.9695	49.8045
425	11.4795	13.6797	21.6719	17.5265	10.2735	28.9199	23.0887	31.2135	61.9472
426	37.3646	24.5655	48.3529	15.118	47.6098	49.7047	146.474	13.6509	69.6398
427	45.2377	31.6684	68.2819	201.382	61.5657	116.214	12.9298	16.9934	25.6416
428	32.2134	22.4372	51.0211	216.854	12.547	42.4421	119.413	19.0061	67.5319
429	43.1571	26.632	50.0636	193.472	10.8297	39.6042	102.444	18.3121	68.374
430	11.221	17.6456	20.989	353.106	91.0725	141.78	41.9436	28.8007	54.534
431	118.202	63.3943	112.344	78.377	26.341	44.0634	90.406	33.7113	38.054
432	216.147	88.2421	162.944	15.7251	10.0807	50.1198	59.405	36.3041	89.1097
433	10.0757	33.9106	83.9131	25.3031	13.4696	85.1329	47.279	21.172	49.7488
434	10.4399	29.0353	87.8319	43.9249	54.7702	97.1483	250.545	21.4731	51.7597
435	7.5083	28.5275	31.7709	490.38	78.8423	151.28	96.774	10.7484	63.095
436	32.645	30.7316	66.0116	59.8978	12.8571	38.5456	61.7835	43.9865	92.1235
437	7.32329	13.4175	16.8183	213.665	59.2136	102.819	10.1875	23.7963	34.2839
438	66.7869	33.966	80.2186	115.028	48.9438	96.0706	57.8169	20.4122	53.2304
439	47.4064	10.0234	35.1558	107.466	53.559	92.778	216.024	20.4392	44.4211
440	31.2755	9.06448	52.5503	77.9947	42.3558	67.1322	73.3541	34.5869	40.0093
441	115.035	12.8758	44.2484	41.8513	33.4124	71.169	206.229	21.2198	69.1866
442	14.8242	19.1446	23.2877	14.1972	24.8643	57.0588	24.382	21.0736	40.2978
443	7.20212	16.9572	33.3159	266.077	27.6116	78.3357	78.7186	14.4204	50.6891
444	36.4953	27.4783	75.9371	335.424	13.9741	55.1833	139.687	14.9718	54.2228
445	21.6481	34.0323	42.6811	223.382	12.4738	51.6453	12.9665	34.7482	46.3806
446	14.2148	32.0229	35.6581	12.2459	20.1919	43.2852	81.0796	9.7047	37.1511
447	11.9317	31.3595	40.1312	12.7191	36.9957	62.7983	120.575	24.5095	66.8198
448	17.4241	12.0619	33.7444	14.2184	42.0829	65.8372	51.3713	8.24042	50.5608
449	22.2697	26.5966	44.7352	220.842	9.23711	70.195	151.626	11.2358	44.4163
450	23.9661	30.6202	47.8274	54.3726	34.2197	56.5314	214.513	13.2639	61.4292
451	9.94511	18.988	33.1282	15.9426	38.3652	56.4033	294.43	56.8238	137.159
452	12.689	39.5769	40.5695	11.3168	24.9647	62.8287	21.1588	19.405	49.7405
453	36.9082	24.2481	53.3115	177.968	20.9589	77.3125	184.485	14.4474	57.4096
454	94.1837	16.8092	50.0186	204.779	16.5849	74.9931	160.916	7.79803	67.2321
455	92.4085	47.1019	91.5201	13.3646	37.9392	67.5356	104.144	11.3063	71.8414
456	68.9959	20.4461	42.9956	12.7236	28.0156	68.9237	13.3392	8.66699	24.1309
457	24.4086	27.4894	53.6683	12.3859	31.7158	56.6162	112.886	13.4523	42.8741
458	37.9095	22.8602	49.0905	16.058	40.587	51.7551	65.838	33.5489	65.9917
459	92.5241	9.81627	66.5605	11.7091	20.8136	30.8046	16.43	17.9516	78.2985
460	28.4019	37.0038	63.8077	23.2351	64.819	49.6318	52.3472	17.3864	77.7411
461	26.7192	17.3228	42.3571	14.2999	37.9418	73.9972	107.696	14.7225	71.7031
462	41.3753	12.8356	32.4453	15.3004	44.4391	45.5513	149.609	9.37094	67.4175
463	8.14382	26.6365	70.7866	23.8604	47.3261	71.923	163.349	11.4804	49.0096
464	23.7024	29.6005	47.1628	13.7037	39.8266	68.4902	183.49	5.58581	49.292
465	89.6678	82.6468	153.881	16.7091	30.6506	44.7528	140.897	14.103	94.4568
466	43.446	24.7774	53.9479	14.1665	20.4172	42.8242	336.228	33.3955	98.9909
467	20.1463	42.9371	77.5612	14.1598	39.9637	31.4247	29.9505	21.5814	69.0301
468	32.1878	27.6897	50.6949	17.0656	40.5545	57.457	24.1722	14.1299	36.8133
469	13.8292	26.3146	37.3495	44.4114	88.0431	110.241	25.4741	16.1971	45.9211
470	8.65549	32.5166	33.7117	40.7022	61.1156	96.7087	159.874	22.7586	44.717
471	33.7713	27.8808	43.469	24.0653	62.0152	72.4432	139.274	17.2748	91.3028
472	28.9365	30.1173	57.3844	22.9247	57.8935	61.988	169.497	18.1409	74.4352
473	8.45704	21.7533	47.4386	14.7641	28.3631	37.2005	138.334	23.5829	60.263
474	8.7284	18.6001	36.8138	24.4157	59.5446	53.0228	140.84	19.0143	71.8906
475	10.6629	39.0233	49.3094	29.3241	43.9271	80.7284	122.987	22	46.4822
476	60.1418	16.9539	53.1755	18.2637	41.2373	55.3845	36.0077	12.2134	43.2906
477	8.89047	32.2316	57.3319	25.8456	69.0529	56.1737	59.6928	15.2443	43.8105
478	23.6647	20.6695	51.5713	37.9272	71.5157	105.09	316.159	9.7825	46.2124
479	41.5455	18.8295	37.6415	20.1682	53.7308	72.9101	13.5265	41.2538	64.4231
480	87.5396	28.3569	81.6514	24.8732	50.8227	67.5214	67.0893	31.9788	31.0668
481	10.2885	30.3679	47.704	62.476	21.1161	103.244	10.316	24.2959	87.1063
482	36.1331	39.8724	60.5591	108.074	16.3938	110.329	64.1619	9.60796	59.8781
483	10.8783	45.0854	57.6148	45.9888	83.0593	115.199	234.305	37.88	48.976
484	8.6812	23.522	41.3364	63.3586	24.5151	94.3394	181.534	14.5055	48.5554
485	22.2276	15.9743	36.748	42.9589	17.7107	83.9301	73.1693	25.9699	46.2245
486	10.0539	28.1601	27.4348	56.2318	27.491	97.1588	23.5038	26.9781	50.2012
487	10.2328	28.8362	50.3243	32.3423	30.7286	98.7887	188.081	12.0137	70.5079
488	14.4438	42.5431	59.3141	37.0745	55.9357	99.9512	141.488	19.4549	59.1825
489	34.1481	26.7736	41.9102	47.9863	47.2404	68.4929	12.4687	25.8583	66.4717
490	35.2511	40.8954	57.1153	51.3033	54.5007	67.033	154.598	27.9864	53.7648
491	10.1273	27.8606	37.1522	27.8066	23.4055	42.0877	55.4141	22.2556	57.6344
492	29.362	19.8663	47.3228	45.1399	34.4662	55.7474	189.094	5.50646	45.9825
493	29.1007	24.2668	40.6494	53.2963	47.15	69.2657	77.2531	35.0573	64.1494
494	41.0881	24.973	52.1421	41.0219	35.8005	68.4452	184.155	10.2245	67.4932
495	16.2571	25.1813	56.218	21.4162	29.3533	45.2092	46.0213	26.5041	50.9399
496	23.219	50.8257	75.8065	112.899	89.3558	135.61	210.044	8.27192	88.185
497	26.9933	51.1348	62.2671	24.5468	48.1551	55.0958	62.4876	16.2019	65.5095
498	36.7911	31.9587	47.9263	37.7179	59.3396	55.87	373.131	6.64511	43.2522
499	10.5157	34.8238	53.5573	29.851	38.9975	87.9141	32.9217	15.0319	49.4095
500	11.7347	27.5657	51.698	45.9271	39.0145	84.4561	70.767	26.6571	44.1667
501	15.2501	10.8948	34.2798	34.6907	31.2289	52.9185	68.9281	17.0763	60.064
502	9.75192	20.8928	47.0694	19.5196	29.8339	63.5078	8.45209	21.7457	59.1064
503	16.6663	29.6461	74.8643	31.0495	38.9969	67.2164	177.227	16.9996	86.3966
504	14.3218	56.9858	49.6059	35.7593	24.8925	80.4439	19.0473	18.2329	45.573
505	13.7207	31.5908	35.2525	28.655	19.9254	78.0667	77.2578	19.7654	36.8503
506	17.4966	18.4246	41.1056	23.6566	35.6954	63.365	127.625	17.9587	51.99
507	16.3834	28.589	58.2615	44.5396	32.378	75.8082	229.218	12.8493	87.9248
508	8.8561	22.4132	28.8862	196.138	74.4176	173.62	191.951	30.0662	66.3672
509	17.8148	30.4552	84.6098	202.813	80.2336	159.755	168.046	15.3179	71.8052
510	18.9503	25.499	46.1914	158.118	86.1985	157.099	145.93	24.0663	42.4718
511	40.1761	56.4351	80.5646	151.635	80.2277	142.602	27.7346	8.37691	77.7218
512	34.4456	28.9451	48.5486	207.285	66.9022	107.725	109.161	20.6681	79.8014
513	19.1505	43.8371	75.7181	173.379	96.9024	126.575	24.7981	15.5298	34.279
514	79.3256	23.5965	38.0714	139.807	81.0391	126.362	179.292	11.0711	42.2159
515	26.4118	52.3816	55.3783	118.589	45.3291	59.5143	25.1026	15.1041	50.5115
516	11.5193	14.9524	48.6222	13.6551	14.5123	31.0563	265.454	24.0013	82.7039
517	13.9253	48.9673	78.2078	20.9926	18.5343	39.8018	115.243	8.0823	65.7085
518	123.303	28.1701	43.8259	19.8371	19.6183	38.7778	31.0187	50.8008	45.1124
519	11.3273	31.1467	50.0781	98.7936	34.7603	96.0835	256.891	11.769	97.1183
520	19.7194	31.9362	41.8551	86.9449	31.8907	96.9125	222.356	9.39717	47.4906
521	13.6368	23.5181	54.7897	19.1802	44.9528	67.6491	34.4346	20.984	59.6339
522	11.2068	34.5719	62.9404	19.3758	84.6251	118.239	101.402	13.8289	77.6154
523	15.8816	27.294	50.3048	35.8564	15.8757	46.7297	176.244	30.7148	70.033
524	12.3087	26.918	30.0383	40.0068	31.7749	39.1174	16.3254	38.9361	63.8636
525	246.285	14.4985	58.0478	14.22	24.2048	33.6952	378.137	11.7369	54.1479
526	28.2565	43.1804	67.7304	24.2264	41.6204	48.7921	301.952	15.6614	101.055
527	71.0003	20.9265	36.6895	13.6794	33.9581	39.5595	140.083	5.68117	55.5457
528	26.4925	25.0747	35.8357	9.26459	27.1545	28.0129	347.162	19.5967	126.244
529	10.5243	36.2377	41.912	82.478	32.8446	76.3647	16.3838	12.3845	19.7543
530	16.1855	35.3976	48.5992	11.6587	29.368	43.8797	148.431	11.3966	70.8058
531	17.5027	22.738	72.2485	36.2137	35.0016	50.8627	278.824	11.2546	121.522
532	60.5068	16.3497	35.1927	251.844	20.2383	62.2692	17.2335	33.2929	42.4858
533	27.5648	57.4422	67.8713	9.3612	20.0339	36.1359	174.056	10.7376	82.8639
534	12.3545	38.1218	79.6709	14.4753	25.42	58.7593	217.973	7.89456	105.548
535	272.304	23.7062	54.0199	22.7709	34.3498	34.2754	216.176	14.6279	117.099
536	11.7746	31.7276	60.763	9.933	17.8872	44.4247	14.4555	45.8718	50.714
537	7.86962	13.0211	30.3222	12.9749	17.6839	40.6592	282.49	15.2775	103.079
538	14.0594	32.7261	47.6879	15.0608	30.9323	65.0416	342.505	40.3282	160.299
539	228.768	18.5572	55.2417	14.1662	26.1377	35.3527	316.466	10.9115	81.6108
540	9.46855	17.7255	48.491	14.9754	17.8193	55.6981	153.798	34.7744	57.5841
541	8.7859	19.3945	40.6596	20.2093	19.5581	37.5069	350.121	54.6055	182.028
542	8.71977	22.6175	34.5554	53.9733	30.3246	62.7602	275.971	38.809	121.573
543	10.0013	15.2008	31.9336	21.5286	19.4435	36.1319	76.8992	19.4912	80.0372
544	305.328	22.5238	64.1919	8.71433	19.7509	27.3249	282.552	56.8414	118.257
545	36.1049	26.4664	45.6034	31.707	22.4115	36.0859	46.2151	5.09938	25.4909
546	50.1981	26.092	43.6206	17.2062	34.0157	38.219	38.16	26.1455	71.1349
547	11.327	35.8274	39.2917	116.665	26.4298	53.8519	34.1209	43.9101	52.3454
548	9.02753	13.1902	41.0284	8.075	27.3575	24.1256	33.2679	53.9082	55.6056
549	25.3814	38.1253	45.0835	34.8839	18.5196	49.5841	35.7782	9.00384	32.0019
550	21.3476	39.6071	45.9124	43.33	24.2814	59.5327	57.4052	51.8157	109.331
551	50.9603	40.9021	41.224	14.8759	17.5698	54.3882	55.0141	48.8411	42.7359
552	22.7046	26.4655	45.1952	7.28987	15.015	34.0938	12.5034	29.7172	57.082
553	11.2526	39.466	52.2854	245.02	37.8847	63.9563	22.868	41.722	77.5819
554	13.7201	51.0039	44.4033	317.461	34.886	78.6188	52.1757	45.3914	38.6128
555	11.8464	45.1088	28.1508	24.1356	39.3241	45.4102	20.8816	46.8173	62.4723
556	16.397	63.3747	43.1078	8.42238	17.4736	27.8968	49.0678	37.3796	72.2018
557	8.73547	20.2981	41.4211	28.8259	35.5332	42.888	123.166	10.5052	35.0804
558	20.2792	55.3359	122.194	16.037	28.5311	40.2178	52.3785	75.655	111.122
559	18.0975	44.1695	112.199	120.253	36.9942	83.5106	23.2255	57.0846	70.7248
560	21.0944	68.3633	72.3544	12.1729	14.4483	27.8003	143.162	13.324	51.7526
561	63.7504	39.2339	52.7743	32.9551	24.9248	51.9141	37.2491	59.8319	115.041
562	9.82512	19.1172	46.8679	21.8535	22.6875	39.6257	66.4768	28.8762	71.5695
563	22.7995	64.7627	86.5217	23.4251	18.172	46.4204	35.1261	27.6001	37.4978
564	24.9829	56.8206	83.5472	30.9122	36.2004	45.5669	175.854	6.48536	47.311
565	11.5143	13.7639	30.4068	13.3687	9.02706	53.4553	97.4869	24.5008	30.2576
566	11.5531	32.4192	76.9358	132.689	49.0382	87.0309	26.5567	47.531	68.8514
567	17.0059	44.2698	45.1957	12.0336	23.2358	31.6352	27.4042	23.5244	51.7536
568	15.8964	36.9918	41.3995	9.01129	21.7629	32.8671	142.161	31.9537	86.0274
569	30.1965	59.1031	73.1944	50.0478	50.1986	66.7961	10.6389	40.8977	75.1209
570	20.1465	63.5708	61.4408	8.37665	22.9749	29.3938	27.2017	42.4732	79.8576
571	10.33	14.7702	29.377	58.4896	20.9952	32.881	126.415	15.7068	44.1215
572	17.4455	36.9909	59.3893	60.4021	44.6002	69.2526	43.5775	32.3724	70.3896
573	10.1683	22.4877	38.3211	29.3836	19.227	31.5915	68.6247	18.4139	68.4247
574	16.3355	36.1279	63.4467	18.1385	40.8753	41.5857	140.347	23.8661	51.8114
575	9.39881	17.9137	45.8175	15.0193	39.6238	33.3808	203.111	26.8662	127.524
576	33.7192	44.6047	54.2919	10.7071	10.8222	21.9323	143.348	15.2621	61.4964
577	21.6172	42.4143	60.7438	13.4775	12.7795	39.947	322.19	21.8874	112.652
578	12.0958	22.2116	60.2212	49.1769	12.6446	27.7134	263.515	28.6072	120.353
579	30.8404	45.7898	47.9166	17.817	34.3457	39.4397	281.136	30.0061	116.667
580	7.86007	19.889	43.3913	13.4892	11.2943	42.8552	296.792	45.3833	119.169
581	10.1428	30.7533	63.6216	60.6995	26.8572	35.1121	24.6012	26.078	51.0787
582	9.30357	14.2359	44.473	14.0476	41.9845	55.6362	64.6703	16.1133	55.0394
583	11.6241	34.0855	48.3158	160.348	35.7235	82.5286	178.528	22.3733	51.6957
584	10.8629	22.1865	52.1262	24.558	25.3373	47.2805	262.554	33.7294	71.9983
585	16.7152	37.5522	39.9665	40.7206	33.8824	65.0952	31.8234	28.3539	34.2654
586	74.9313	29.2155	55.7777	92.2554	21.7298	59.3147	73.2102	33.863	70.1396
587	13.2197	38.8679	68.4566	14.3469	38.723	67.0479	123.115	17.2514	79.58
588	10.16	26.5855	51.6917	18.7472	25.6846	39.3746	101.484	23.7869	63.6447
589	27.145	50.3304	92.4661	74.1042	37.3084	78.9782	81.0811	12.6264	19.685
590	11.8812	27.3658	59.5042	14.0869	12.1873	41.0781	58.4606	25.7131	34.4392
591	12.8534	32.8568	56.0098	13.1943	22.4769	64.4521	82.0495	18.49	60.762
592	35	64.782	77.9966	82.9535	34.5354	77.6991	138.385	11.7818	52.7899
593	8.83863	15.6003	46.84	26.3351	43.1353	44.3953	151.78	29.252	54.2092
594	9.17575	16.7728	39.8284	18.2151	23.3813	39.9049	293.521	85.0991	50.4233
595	11.059	26.0293	55.4725	24.3672	13.4692	35.0928	332.705	135.274	77.0294
596	9.1677	25.689	50.6775	13.3091	9.3569	37.5566	228.311	59.0541	42.7959
597	14.4443	40.9177	50.2476	115.745	38.7562	102.622	130.612	18.4667	76.9804
598	30.1911	28.261	70.5417	42.1831	35.4484	62.9922	133.896	11.5827	82.4516
599	10.7765	32.9182	64.132	17.9153	27.2201	69.4541	319.595	21.4779	142.295
600	20.8132	30.7318	31.9054	14.3536	47.3255	63.3597	10.5085	32.3285	21.9442
601	18.8151	42.4333	30.6219	18.6883	19.0675	37.2258	183.935	17.6108	45.2451
602	7.338	12.3631	32.477	37.4669	33.365	50.0901	334.328	23.1873	153.944
603	112.237	36.423	53.7227	33.7421	57.2483	65.5448
604	11.0403	22.6677	47.8126	17.527	65.1117	46.4813
605	10.6895	20.3007	44.3076	24.8321	35.0938	43.1089
606	13.5463	39.9133	54.6329	10.7479	48.7521	58.9604
607	8.3161	29.277	62.1748	53.2452	16.3897	42.4503
608	12.9672	18.5198	37.2071	24.3909	19.0802	37.9968
609	13.0434	25.8281	43	17.3561	31.3732	41.7239
610	20.8489	37.8836	37.4663	32.4303	21.19	47.5402
611	8.67753	11.975	36.529	49.9335	46.9163	51.6756
612	10.9663	18.4989	36.9895	56.0466	18.1866	63.669
613	10.2377	27.0984	21.7752	20.7442	34.2424	46.4357
614	8.85321	20.8383	57.687	64.5413	40.1763	38.0084
615	54.4314	29.6581	66.0909	66.3798	12.6603	40.8039
616	15.4527	44.3588	90.1642	14.9217	39.1692	38.0561
617	34.9304	32.4227	70.6961	58.4073	37.4029	37.5261
618	170.49	19.8509	76.6902	12.6012	32.3097	41.9926
619	221.096	36.8394	117.371	62.8944	40.1333	55.453
620	141.236	18.4568	80.6727	15.3848	14.4823	42.4916
621	12.6481	36.9591	57.4775	36.8439	27.0902	43.5376
622	90.0924	49.5967	39.7942	62.9848	22.4197	57.0533
623	213.151	79.5232	98.3421	13.9014	17.8956	44.8997
624	6.75891	13.1132	31.5781	11.6943	30.4949	33.692
625	15.3155	30.9745	88.2145	9.32377	33.5022	27.1037
626	24.5843	32.843	94.9566	293.282	26.6707	67.4992
627	9.86852	14.1185	49.913	29.9979	19.2564	29.7761
				21.3487	20.3637	47.2858
				92.2571	42.034	64.7354
				18.6912	10.1386	28.3331
				29.8415	44.3199	60.5284
				69.3845	30.1769	60.544
				15.8256	35.0479	57.7424
				16.7162	31.2758	39.0045
				38.2706	17.0167	37.4607
				48.2161	33.0407	149.811
				36.9097	17.2699	41.7001
				27.4436	38.6367	27.9087
				31.7159	22.4679	58.36
				284.193	30.9609	76.3596
				283.678	37.3748	87.8173
				18.7654	37.2269	36.0012
				107.574	19.3102	62.9993
				45.5851	75.7585	59.6871
				23.5313	14.0913	35.4617
				24.0029	46.8341	65.1133
				28.1326	18.5899	33.4194
				17.3715	46.4437	46.6413
				28.5723	36.3197	63.8553
				95.9467	28.6379	67.5312
				68.2042	43.8163	45.2795
				23.6137	25.9291	41.186
				14.4315	27.5134	44.4831
				273.301	22.4155	58.9124
				18.1893	42.2268	45.4425
				20.367	23.5538	52.4989
				103.136	44.3699	84.1147
				124.678	41.6551	91.1778
				39.252	28.6474	62.8191
				111.755	25.0724	76.7804
				142.339	34.8667	99.2468
				34.2913	21.2254	37.557
				56.0285	26.601	52.1642
				44.3254	28.1032	40.4188
				54.9687	26.3064	82.6279
				14.7842	47.3369	34.6086
				20.0927	36.1388	44.4148
				38.351	27.1594	51.4205
				38.3591	51.3535	37.2167
				350.732	43.3465	98.7727
				97.097	36.2513	82.2217
				178.34	40.9587	104.471
				39.9189	32.5603	92.8453
				48.7296	28.835	78.5493
				44.7875	49.3433	40.6154
				80.0518	31.4582	76.7591
				122.061	40.8569	101.268
				27.8593	18.9883	58.1586
				13.3379	38.3333	55.291
				21.9738	22.839	64.282
				153.977	46.5125	96.4712
				28.5138	20.2147	31.1004
				26.3227	25.581	37.5858
				14.2183	56.7012	47.9659
				22.2282	44.8262	42.4812
				60.5873	34.1634	56.6905
				11.6139	24.4018	47.8485
				17.0209	60.1547	80.7828
				123.88	33.1155	92.4899
				19.6344	59.9324	59.0078
				19.858	39.9542	54.793
				14.624	58.4579	49.0703
				22.2917	26.2096	44.3794
				31.137	26.3849	57.0477
				115.508	52.7647	117.856
				114.837	51.3222	115.514
				14.9852	20.7088	46.7593
				45.4476	37.6513	57.8833
				15.7269	50.6623	54.976
				45.6349	47.1905	53.8057
				33.3512	23.5634	34.0789
				19.3555	25.4941	44.9767
				13.6538	47.0779	48.8854
				26.8256	43.3446	51.5999
				9.42183	25.1701	43.0118
				23.0652	46.533	51.7704
				29.4774	44.2066	93.7917
				16.1574	62.0068	74.3346
				14.283	43.1144	55.1909
				30.6298	47.8842	61.9047
				11.6404	35.1968	38.2277
				16.6446	40.7964	53.5082
				107.589	29.4333	85.169
				12.7948	38.1634	56.1398
				116.924	40.1349	104.233
				128.096	27.0648	89.8952
				47.8194	22.6245	66.9372
				17.8525	50.9653	54.8853
				11.1411	22.8524	41.816
				10.0607	29.5804	42.3842
				12.241	40.4648	32.3765
				169.436	35.9185	100.92
				77.6506	24.6938	85.5156
				94.3909	24.0394	65.2879
				139.496	28.1841	97.6314
				11.2777	40.4922	46.0796
				31.6395	33.7696	65.4246
				12.6009	36.5002	47.4731
				12.3389	44.5449	37.1687
				88.6408	21.7502	77.8245
				12.421	45.2608	41.7061
				47.4307	45.3571	79.8307
				11.4842	23.1013	39.4891
				11.0333	30.605	45.4917
				122.521	19.6575	66.2719
				116.054	18.7234	61.8191
				69.1041	24.3519	65.7362
				11.4542	23.6913	43.3829
				107.381	42.5303	111.184
				60.9169	37.1671	72.0259
				34.2388	32.1367	47.3362
				95.3161	51.0976	117.996
				188.214	18.7739	61.3661
				111.326	33.3432	85.2869
				37.1058	32.925	56.6037
				18.9906	31.9481	80.167
				27.6082	12.2251	29.129
				46.1461	39.3499	53.8843
				267.775	66.7518	144.793
				127.227	55.1257	127.714
				10.9599	19.7066	42.5225
				33.951	37.2306	83.0034
				11.4614	24.7338	39.9397
				28.2711	22.5084	43.9858
				12.051	31.837	77.3587
				73.6817	42.1808	120.444
				27.4261	14.2865	31.4657
				39.8996	27.2139	55.4624
				66.0474	76.5752	82.694
				13.9288	34.634	83.7837
				62.1877	27.1865	57.8969
				101.804	44.6642	121.53
				19.6089	41.1049	71.1522
				9.61401	16.029	33.8609
				111.331	24.6904	84.8963
				110.821	24.1769	80.8641
				137.536	31.7648	80.2487
				153.193	51.8852	87.5097
				77.7221	42.443	74.8009
				51.7235	22.131	49.9177
				91.4438	18.1445	59.2669
				145.858	35.1309	88.4597
				276.36	29.7258	91.8512
				30.8199	16.5951	53.7952
				56.8018	27.9194	80.1795
				64.8905	23.9472	64.6561
				74.1511	25.3864	75.4512
				154.396	34.3555	85.673
				77.7118	35.1896	127.442
				98.9574	36.3787	78.5389
				10.1271	20.0867	75.6253
				66.176	68.0263	52.3408
				20.4259	24.1957	64.5281
				28.65	26.8537	63.7
